# Supplementary material for: Computational exploration of the mechanism of copper-catalyzed aromatic C–H bond amination of benzene via a nitrene insertion approach
Source: Royal Society of Chemistry journal article supplement (doi:10.1039/c5cc06064h), 2015-01-01
Supplement: c5cc06064h1.pdf [file c5cc06064h1.pdf]

## Supporting Information

### Computational Exploration on the Mechanism of Copper-Catalyzed Aromatic C-H Bond Amination of Benzene via a Nitrene Insertion Approach

Kaipeng Hou,<sup>a</sup> David A. Hrovat,<sup>b</sup> and Xiaoguang Bao<sup>a\*</sup>

<sup>a</sup> College of Chemistry, Chemical Engineering and Materials Science, Soochow University, 199 Ren-Ai Road, Suzhou Industrial Park, Suzhou, Jiangsu 215123, China.

<sup>b</sup> Department of Chemistry and the Center for Advanced Scientific Computing and Modeling, University of North Texas, 1155 Union Circle, #305070, Denton, Texas 76203-5017, United States

E-mail: [xgbao@suda.edu.cn](mailto:xgbao@suda.edu.cn)

#### List of Contents

|                                                 |             |
|-------------------------------------------------|-------------|
| <b>Computational Methods</b> .....              | <b>2</b>    |
| <b>Figure S1 and Table S1</b> .....             | <b>3</b>    |
| <b>Figure S2</b> .....                          | <b>4</b>    |
| <b>References</b> .....                         | <b>5</b>    |
| <b>Cartesian Coordinates and Energies</b> ..... | <b>6-33</b> |

## Computational Methods

The M06 functional<sup>1</sup> was employed in this work to carry out all the calculations. This functional has shown excellent performance to describe similar intermediate in literature.<sup>2</sup> The LANL2DZ basis set, in conjunction with the LANL2DZ pseudo potential,<sup>3</sup> was used for the Cu and Br atoms and the 6-31G(d) basis set<sup>4</sup> was used for other atoms in all geometry optimizations. Vibrational frequency analyses at the same level of theory were performed on all optimized structures to characterize stationary points as local minima or transition states. Further, intrinsic reaction coordinates (IRC) calculations were carried out to confirm that transition states connect appropriate reactants and products. The gas-phase Gibbs free energies for all species were obtained at 298.15K and 1 atm at optimized structures.

To consider solvation effects, single-point energy calculations using the SMD solvent model<sup>5</sup> with benzene as solvent were performed based on the optimized gas-phase geometries of all the species. Larger basis sets (LANL2DZ for Cu and 6-311++G(d,p) for other atoms) were utilized in such single-point energy calculations. The solution-phase Gibbs free energy was determined by adding the solvation single-point energy and the gas-phase thermal correction to the Gibbs free energy obtained from vibrational frequency calculation. Unless otherwise specified, the solution-phase Gibbs free energy was used in the discussion. Such single-point energy calculations with the SMD solvent model were also executed using  $\omega$ B97XD functional<sup>6</sup>, which supported the reliability of M06 functional in describing the copper-nitrene complex.

The broken-symmetry method was used in optimizing the structure of open-shell singlet state.<sup>7</sup> The real energy of open-shell singlet state ( $E_{os}$ ) was evaluated by the following formula<sup>8</sup>:

$$E_{os} = (S_1^2 E_0 - S_0^2 E_1) / (S_1^2 - S_0^2)$$

where  $E_0$  is the energy of optimized broken-symmetry solution and  $E_1$  is the energy of triplet state at the same geometry, respectively.  $S_0$  and  $S_1$  refer to spin contaminations of the open-shell singlet state and triplet state, respectively. The Gaussian 09 suite of programs<sup>9</sup> was used for all of the calculations.

The single-point CASSCF energy calculations were carried out at the geometries optimized at the B3LYP<sup>10</sup>/6-31G(d)-LANL2DZ(Cu) level of theory. The 14-electron/14-orbital active space consisted of the two electrons occupying the in-phase and out-of-phase combinations of a p-orbital on the nitrene nitrogen and a d-orbital on copper along with the twelve electrons in the six highest energy occupied  $\pi$  MOs and corresponding antibonding MOs of the Tp ligand. The CASSCF calculations were performed using the MOLCAS program (Version 8.0).<sup>11</sup>

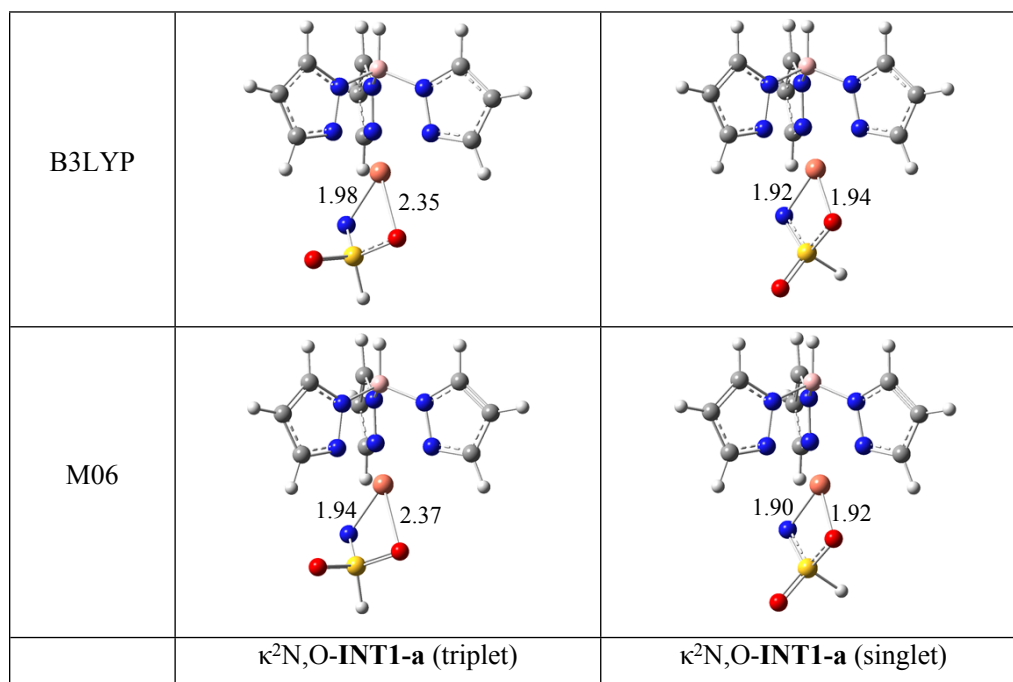

**Figure S1.** The optimized triplet and singlet structures of  $\kappa^2\text{N,O-INT1-a}$ , a truncated simpler model of  $\kappa^2\text{N,O-INT1}$ , at the B3LYP/6-31G(d)-LANL2DZ(Cu) and the M06/6-31G(d)-LANL2DZ(Cu) levels of theory. Bond lengths are shown in Å.

**Table S1.** Calculated singlet triplet splitting of  $\kappa^2\text{N,O-INT1-a}$  at various levels of theory.

| Method                                                         | $\Delta E^a$ | $\Delta G^a$       |
|----------------------------------------------------------------|--------------|--------------------|
| B3LYP/6-31G(d)-LANL2DZ(Cu)                                     | -5.1         | -7.8               |
| B3LYP/6-311++G(d,p)-LANL2DZ(Cu)//B3LYP/6-31G(d)-LANL2DZ(Cu)    | -4.9         | -7.5               |
| M06/6-31G(d)-LANL2DZ(Cu)                                       | -4.4         | -6.2               |
| M06/6-311++G(d,p)-LANL2DZ(Cu)//M06/6-31G(d)-LANL2DZ(Cu)        | -4.3         | -6.1               |
| (14/14)CASSCF/6-31G(d)-LANL2DZ(Cu)//B3LYP/6-31G(d)-LANL2DZ(Cu) | -7.3         | -10.0 <sup>b</sup> |

<sup>a</sup> Electronic energies and Gibbs free energies are in kcal/mol ( $\Delta E = E(\text{triplet}) - E(\text{singlet})$ ). Negative number means that triplet is the ground state. <sup>b</sup> Thermal and entropic corrections are calculated at the B3LYP/6-31G(d)-LANL2DZ(Cu) level of theory.

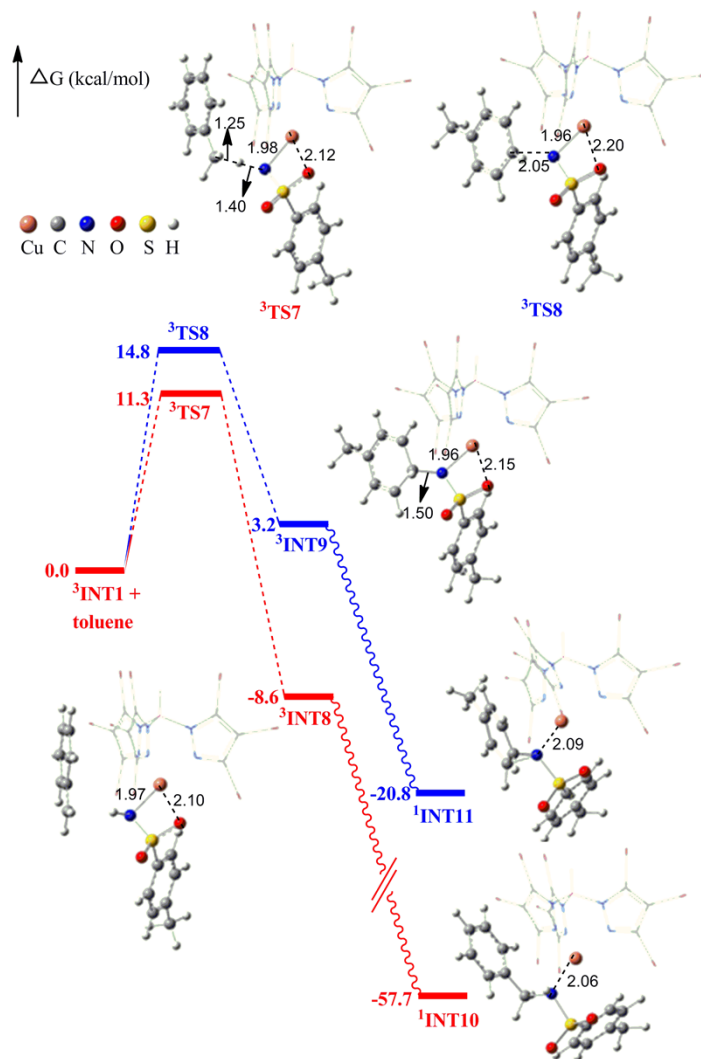

**Figure S2.** Free energy profiles for the benzylic C-H bond amination of toluene via the HAA/RR path (shown in red) and the formation of the aziridine intermediate via the nitrene addition path (shown in blue). The  $\text{Tp}^{\text{Br}3}$  ligand is shown in line style for clarity. Bond lengths are shown in Å.

## References:

- (1) Y. Zhao and D. G. Truhlar, *J. Chem. Phys.*, 2006, **125**, 194101.
- (2) L. Maestre, W. M. C. Sameera, M. M. Díaz-Requejo, F. Maseras and P. J. Pérez, *J. Am. Chem. Soc.*, 2013, **135**, 1338.
- (3) P. J. Hay and W. R. Wadt, *J. Chem. Phys.*, 1985, **82**, 299.
- (4) W. J. Hehre, R. Ditchfield and J. A. Pople, *J. Chem. Phys.*, 1972, **56**, 2257.
- (5) A. V. Marenich, C. J. Cramer and D. G. Truhlar, *J. Phys. Chem. B.*, 2009, **113**, 6378
- (6) J.-D. Chai and M. Head-Gordon, *Phys. Chem. Chem. Phys.*, 2008, **10**, 6615.
- (7) L. Noodleman, *Chem. Phys.*, 1981, **74**, 5737.
- (8) K. S. Chan, X. Z. Li, W. I. Dzik and B. de Bruin, *J. Am. Chem. Soc.*, 2008, **130**, 2051.
- (9) M. J. T. Frisch, G. W. H. B. Schlegel, G. E. Scuseria, M. A. Robb, J. R. Cheeseman, G. Scalmani, V. Barone, B. Mennucci, G. A. Petersson, H. Nakatsuji, M. Caricato, X. Li, H. P. Hratchian, A. F. Izmaylov, J. Bloino, G. Zheng, J. L. Sonnenberg, M. Hada, M. Ehara, K. Toyota, R. Fukuda, J. Hasegawa, M. Ishida, T. Nakajima, Y. Honda, O. Kitao, H. Nakai, T. Vreven, J. A. Montgomery, Jr., J. E. Peralta, F. Ogliaro, M. Bearpark, J. J. Heyd, E. Brothers, K. N. Kudin, V. N. Staroverov, R. Kobayashi, J. Normand, K. Raghavachari, A. Rendell, J. C. Burant, S. S. Iyengar, J. Tomasi, M. Cossi, N. Rega, J. M. Millam, M. Klene, J. E. Knox, J. B. Cross, V. Bakken, C. Adamo, J. Jaramillo, R. Gomperts, R. E. Stratmann, O. Yazyev, A. J. Austin, R. Cammi, C. Pomelli, J. W. Ochterski, R. L. Martin, K. Morokuma, V. G. Zakrzewski, G. A. Voth, P. Salvador, J. J. Dannenberg, S. Dapprich, A. D. Daniels, Ö. Farkas, J. B. Foresman, J. V. Ortiz, J. Cioslowski and D. J. Fox, *Gaussian 09, Revision C.01*; Gaussian, Inc.: Wallingford CT, 2010.
- (10) (a) A. D. Becke, *J. Chem. Phys.* 1993, **98**, 5648. (b) C. Lee, W. Yang, R. G. Parr, *Phys. Rev. B* 1988, **37**, 785.
- (11) F. Aquilante, L. De Vico, N. Ferré, G. Ghigo, P. Malmqvist, P. Neogrády, T. B. Pedersen, M. Pitoňák, M. Reiher, B. O. Roos, L. Serrano-Andrés, M. Urban, V. Veryazov, R. Lindh, *J. Comput. Chem.* 2010, **31**, 224.

## Cartesian Coordinates and Energies

$\kappa^2\text{N}_2\text{O-INT1}$  (triplet)

| Center Number | Atomic Number | Atomic Type | Coordinates (Angstroms) |           |           |
|---------------|---------------|-------------|-------------------------|-----------|-----------|
|               |               |             | X                       | Y         | Z         |
| 1             | 5             | 0           | -1.670230               | -0.026643 | -0.818924 |
| 2             | 1             | 0           | -2.647922               | -0.079380 | -1.489611 |
| 3             | 7             | 0           | -0.518860               | -0.824466 | -1.496749 |
| 4             | 6             | 0           | -0.534087               | -1.632447 | -2.577094 |
| 5             | 6             | 0           | 0.731718                | -2.155787 | -2.771193 |
| 6             | 6             | 0           | 1.481301                | -1.602092 | -1.729501 |
| 7             | 7             | 0           | -1.945021               | -0.617586 | 0.582394  |
| 8             | 6             | 0           | -3.031987               | -1.224489 | 1.102277  |
| 9             | 6             | 0           | -1.435563               | -1.181128 | 2.596625  |
| 10            | 6             | 0           | -2.754834               | -1.606594 | 2.402418  |
| 11            | 7             | 0           | -1.221923               | 1.453023  | -0.655086 |
| 12            | 6             | 0           | -1.829962               | 2.585823  | -1.061022 |
| 13            | 6             | 0           | -1.055029               | 3.672382  | -0.698744 |
| 14            | 6             | 0           | 0.039861                | 3.096461  | -0.050060 |
| 15            | 7             | 0           | -0.062539               | 1.775465  | -0.016693 |
| 16            | 7             | 0           | -0.959201               | -0.590762 | 1.515813  |
| 17            | 7             | 0           | 0.736358                | -0.813645 | -0.972555 |
| 18            | 29            | 0           | 0.963480                | 0.203387  | 0.861601  |
| 19            | 7             | 0           | 2.113825                | -1.171458 | 1.735246  |
| 20            | 16            | 0           | 2.974697                | -0.019046 | 2.567164  |
| 21            | 8             | 0           | 2.160093                | 1.217998  | 2.303165  |
| 22            | 8             | 0           | 3.287320                | -0.368692 | 3.940644  |
| 23            | 6             | 0           | 4.444733                | 0.086875  | 1.602911  |
| 24            | 6             | 0           | 4.587314                | 1.092491  | 0.649615  |
| 25            | 6             | 0           | 5.406701                | -0.909256 | 1.767544  |
| 26            | 6             | 0           | 5.728325                | 1.103238  | -0.139548 |
| 27            | 1             | 0           | 3.816565                | 1.854777  | 0.538673  |
| 28            | 6             | 0           | 6.531363                | -0.887120 | 0.958323  |
| 29            | 1             | 0           | 5.267212                | -1.682876 | 2.521016  |
| 30            | 6             | 0           | 6.709470                | 0.116147  | -0.002386 |
| 31            | 1             | 0           | 5.859710                | 1.886237  | -0.885847 |
| 32            | 1             | 0           | 7.292309                | -1.659062 | 1.071177  |
| 33            | 6             | 0           | 7.944280                | 0.143230  | -0.848899 |
| 34            | 1             | 0           | 8.750322                | 0.695724  | -0.345731 |
| 35            | 1             | 0           | 8.320883                | -0.867865 | -1.044932 |
| 36            | 1             | 0           | 7.764833                | 0.635206  | -1.812046 |
| 37            | 35            | 0           | -2.084210               | -1.969777 | -3.628558 |
| 38            | 35            | 0           | 1.315642                | -3.335001 | -4.143114 |
| 39            | 35            | 0           | 3.338692                | -1.848145 | -1.383908 |
| 40            | 35            | 0           | 1.533802                | 4.014925  | 0.689770  |
| 41            | 35            | 0           | -1.403034               | 5.516063  | -1.001581 |
| 42            | 35            | 0           | -3.506079               | 2.622927  | -1.961491 |
| 43            | 35            | 0           | -4.656197               | -1.474079 | 0.139307  |
| 44            | 35            | 0           | -3.894676               | -2.497328 | 3.635172  |
| 45            | 35            | 0           | -0.357320               | -1.363811 | 4.153725  |

Zero-point correction= 0.240562 (Hartree/Particle)  
Thermal correction to Energy= 0.280543  
Thermal correction to Enthalpy= 0.281487  
Thermal correction to Gibbs Free Energy= 0.156336  
Sum of electronic and zero-point Energies= -1884.539766  
Sum of electronic and thermal Energies= -1884.499786  
Sum of electronic and thermal Enthalpies= -1884.498842  
Sum of electronic and thermal Free Energies= -1884.623992

$\kappa^2\text{N}_2\text{O-INT1}$  (singlet)

| Center | Atomic | Atomic | Coordinates (Angstroms) |  |  |
|--------|--------|--------|-------------------------|--|--|
|--------|--------|--------|-------------------------|--|--|

| Number | Number | Type | X         | Y         | Z         |
|--------|--------|------|-----------|-----------|-----------|
| 1      | 5      | 0    | -1.775293 | 0.187329  | -0.672652 |
| 2      | 1      | 0    | -2.817023 | 0.305475  | -1.229644 |
| 3      | 7      | 0    | -1.039320 | -1.085334 | -1.201430 |
| 4      | 6      | 0    | -1.511388 | -2.075688 | -1.983554 |
| 5      | 6      | 0    | -0.512752 | -3.009438 | -2.192736 |
| 6      | 6      | 0    | 0.576189  | -2.505082 | -1.478013 |
| 7      | 7      | 0    | -1.979458 | 0.055664  | 0.841983  |
| 8      | 6      | 0    | -3.099243 | 0.048409  | 1.594845  |
| 9      | 6      | 0    | -1.345564 | -0.224718 | 2.873375  |
| 10     | 6      | 0    | -2.744098 | -0.130363 | 2.916696  |
| 11     | 7      | 0    | -0.875000 | 1.420233  | -0.966522 |
| 12     | 6      | 0    | -1.156154 | 2.583961  | -1.584770 |
| 13     | 6      | 0    | -0.016368 | 3.368882  | -1.616746 |
| 14     | 6      | 0    | 0.945270  | 2.586721  | -0.973112 |
| 15     | 7      | 0    | 0.426662  | 1.432189  | -0.579097 |
| 16     | 7      | 0    | -0.890868 | -0.113066 | 1.638178  |
| 17     | 7      | 0    | 0.257069  | -1.361417 | -0.883492 |
| 18     | 29     | 0    | 1.128522  | -0.155136 | 0.493247  |
| 19     | 7      | 0    | 2.121175  | -1.501433 | 1.356706  |
| 20     | 16     | 0    | 3.069443  | -0.512131 | 2.161347  |
| 21     | 8      | 0    | 2.306241  | 0.755540  | 1.696631  |
| 22     | 8      | 0    | 3.254756  | -0.678692 | 3.590808  |
| 23     | 6      | 0    | 4.680274  | -0.375427 | 1.439509  |
| 24     | 6      | 0    | 4.809028  | -0.362897 | 0.050153  |
| 25     | 6      | 0    | 5.794944  | -0.272702 | 2.266273  |
| 26     | 6      | 0    | 6.069715  | -0.224868 | -0.507043 |
| 27     | 1      | 0    | 3.931426  | -0.475768 | -0.585637 |
| 28     | 6      | 0    | 7.050984  | -0.143344 | 1.688776  |
| 29     | 1      | 0    | 5.669270  | -0.299356 | 3.346129  |
| 30     | 6      | 0    | 7.207228  | -0.110596 | 0.301247  |
| 31     | 1      | 0    | 6.181265  | -0.215101 | -1.591123 |
| 32     | 1      | 0    | 7.931142  | -0.068576 | 2.326927  |
| 33     | 6      | 0    | 8.562108  | 0.057325  | -0.314624 |
| 34     | 1      | 0    | 8.759427  | 1.113596  | -0.545845 |
| 35     | 1      | 0    | 9.357193  | -0.282222 | 0.359448  |
| 36     | 1      | 0    | 8.649266  | -0.499781 | -1.255363 |
| 37     | 35     | 0    | -3.285655 | -2.134574 | -2.666403 |
| 38     | 35     | 0    | -0.599925 | -4.597577 | -3.232310 |
| 39     | 35     | 0    | 2.316862  | -3.266207 | -1.411007 |
| 40     | 35     | 0    | 2.783211  | 3.003679  | -0.711446 |
| 41     | 35     | 0    | 0.190486  | 5.102753  | -2.365413 |
| 42     | 35     | 0    | -2.874418 | 3.028983  | -2.265878 |
| 43     | 35     | 0    | -4.851920 | 0.262674  | 0.875341  |
| 44     | 35     | 0    | -3.887832 | -0.227614 | 4.432715  |
| 45     | 35     | 0    | -0.165511 | -0.475704 | 4.345177  |

Zero-point correction= 0.241445 (Hartree/Particle)  
 Thermal correction to Energy= 0.281064  
 Thermal correction to Enthalpy= 0.282008  
 Thermal correction to Gibbs Free Energy= 0.157727  
 Sum of electronic and zero-point Energies= -1884.520627  
 Sum of electronic and thermal Energies= -1884.481008  
 Sum of electronic and thermal Enthalpies= -1884.480064  
 Sum of electronic and thermal Free Energies= -1884.604345

$\kappa^2\text{N}_2\text{O-INT1}$  (open-shell singlet)

| Center Number | Atomic Number | Atomic Type | Coordinates (Angstroms) |           |           |
|---------------|---------------|-------------|-------------------------|-----------|-----------|
|               |               |             | X                       | Y         | Z         |
| 1             | 5             | 0           | -1.679732               | -0.010704 | -0.812444 |
| 2             | 1             | 0           | -2.661227               | -0.042306 | -1.478859 |
| 3             | 7             | 0           | -0.543433               | -0.821847 | -1.497119 |
| 4             | 6             | 0           | -0.569999               | -1.630524 | -2.576239 |
| 5             | 6             | 0           | 0.690351                | -2.165609 | -2.773744 |
| 6             | 6             | 0           | 1.449802                | -1.618272 | -1.735654 |

|    |    |   |           |           |           |
|----|----|---|-----------|-----------|-----------|
| 7  | 7  | 0 | -1.955805 | -0.596276 | 0.588309  |
| 8  | 6  | 0 | -3.042787 | -1.199622 | 1.112068  |
| 9  | 6  | 0 | -1.442275 | -1.154169 | 2.602803  |
| 10 | 6  | 0 | -2.763096 | -1.577877 | 2.412491  |
| 11 | 7  | 0 | -1.201387 | 1.461030  | -0.647505 |
| 12 | 6  | 0 | -1.793137 | 2.602262  | -1.051911 |
| 13 | 6  | 0 | -0.995742 | 3.676911  | -0.703217 |
| 14 | 6  | 0 | 0.096565  | 3.087503  | -0.063270 |
| 15 | 7  | 0 | -0.029510 | 1.766881  | -0.022664 |
| 16 | 7  | 0 | -0.967362 | -0.568045 | 1.518864  |
| 17 | 7  | 0 | 0.713329  | -0.822011 | -0.977696 |
| 18 | 29 | 0 | 0.976748  | 0.205283  | 0.846222  |
| 19 | 7  | 0 | 2.093294  | -1.165494 | 1.732299  |
| 20 | 16 | 0 | 2.945071  | -0.030863 | 2.565245  |
| 21 | 8  | 0 | 2.155133  | 1.228801  | 2.287916  |
| 22 | 8  | 0 | 3.253290  | -0.343256 | 3.949869  |
| 23 | 6  | 0 | 4.423240  | 0.041560  | 1.607408  |
| 24 | 6  | 0 | 4.590609  | 1.032556  | 0.642850  |
| 25 | 6  | 0 | 5.368553  | -0.967868 | 1.791367  |
| 26 | 6  | 0 | 5.737220  | 1.015339  | -0.137806 |
| 27 | 1  | 0 | 3.833221  | 1.806236  | 0.519580  |
| 28 | 6  | 0 | 6.499223  | -0.974239 | 0.990704  |
| 29 | 1  | 0 | 5.209708  | -1.730023 | 2.552485  |
| 30 | 6  | 0 | 6.700964  | 0.013780  | 0.018696  |
| 31 | 1  | 0 | 5.887015  | 1.787438  | -0.892057 |
| 32 | 1  | 0 | 7.246938  | -1.756784 | 1.118492  |
| 33 | 6  | 0 | 7.941705  | 0.010507  | -0.819528 |
| 34 | 1  | 0 | 8.756899  | 0.546033  | -0.312690 |
| 35 | 1  | 0 | 8.296798  | -1.009354 | -1.010607 |
| 36 | 1  | 0 | 7.779505  | 0.503602  | -1.785185 |
| 37 | 35 | 0 | -2.126482 | -1.951648 | -3.622417 |
| 38 | 35 | 0 | 1.257819  | -3.350725 | -4.147199 |
| 39 | 35 | 0 | 3.306233  | -1.879514 | -1.402037 |
| 40 | 35 | 0 | 1.607964  | 3.994419  | 0.650339  |
| 41 | 35 | 0 | -1.312260 | 5.523815  | -1.018187 |
| 42 | 35 | 0 | -3.477984 | 2.664951  | -1.933150 |
| 43 | 35 | 0 | -4.668019 | -1.449510 | 0.151047  |
| 44 | 35 | 0 | -3.901848 | -2.462506 | 3.650517  |
| 45 | 35 | 0 | -0.364722 | -1.332945 | 4.159684  |

-----

Zero-point correction= 0.240600 (Hartree/Particle)  
Thermal correction to Energy= 0.279619  
Thermal correction to Enthalpy= 0.280563  
Thermal correction to Gibbs Free Energy= 0.159906  
Sum of electronic and zero-point Energies= -1884.528697  
Sum of electronic and thermal Energies= -1884.489678  
Sum of electronic and thermal Enthalpies= -1884.488734  
Sum of electronic and thermal Free Energies= -1884.609391

$\kappa^1\text{N-INTI}$  (triplet)

-----

| Center<br>Number | Atomic<br>Number | Atomic<br>Type | Coordinates (Angstroms) |           |           |
|------------------|------------------|----------------|-------------------------|-----------|-----------|
|                  |                  |                | X                       | Y         | Z         |
| 1                | 29               | 0              | 0.912917                | 0.365219  | -0.647980 |
| 2                | 7                | 0              | -0.485073               | -0.832085 | -1.576426 |
| 3                | 7                | 0              | -1.657890               | -1.041519 | -0.923230 |
| 4                | 7                | 0              | 0.488404                | -0.709378 | 1.155745  |
| 5                | 7                | 0              | -0.830248               | -0.864127 | 1.448240  |
| 6                | 7                | 0              | -0.613630               | 1.708889  | -0.169208 |
| 7                | 7                | 0              | -1.778023               | 1.169681  | 0.280192  |
| 8                | 6                | 0              | -0.538593               | -1.522341 | -2.703988 |
| 9                | 6                | 0              | -1.751616               | -2.205917 | -2.819016 |
| 10               | 6                | 0              | -2.427785               | -1.867553 | -1.659202 |
| 11               | 6                | 0              | 1.168267                | -1.248318 | 2.151953  |
| 12               | 6                | 0              | 0.314582                | -1.768503 | 3.129559  |
| 13               | 6                | 0              | -0.948290               | -1.499622 | 2.632369  |
| 14               | 6                | 0              | -0.789496               | 3.018557  | -0.237631 |

-----



|    |    |   |           |           |           |
|----|----|---|-----------|-----------|-----------|
| 15 | 6  | 0 | -2.080078 | 3.372767  | 0.169239  |
| 16 | 6  | 0 | -2.668601 | 2.161604  | 0.487145  |
| 17 | 5  | 0 | -1.911186 | -0.364001 | 0.454136  |
| 18 | 1  | 0 | -2.994899 | -0.637317 | 0.851087  |
| 19 | 35 | 0 | -2.336497 | -3.332618 | -4.233461 |
| 20 | 35 | 0 | -4.161878 | -2.441919 | -1.125975 |
| 21 | 35 | 0 | 0.920883  | -1.499496 | -3.926947 |
| 22 | 35 | 0 | -2.621873 | -1.931332 | 3.431012  |
| 23 | 35 | 0 | 0.773550  | -2.639551 | 4.755478  |
| 24 | 35 | 0 | 3.073896  | -1.278687 | 2.121471  |
| 25 | 35 | 0 | -4.444739 | 1.866046  | 1.107834  |
| 26 | 35 | 0 | -2.849262 | 5.108464  | 0.246423  |
| 27 | 35 | 0 | 0.609955  | 4.152178  | -0.844195 |
| 28 | 7  | 0 | 2.593354  | 1.010584  | -0.912355 |
| 29 | 16 | 0 | 3.779657  | 2.089202  | -0.428811 |
| 30 | 6  | 0 | 5.179851  | 1.021786  | -0.496163 |
| 31 | 8  | 0 | 3.517530  | 2.461168  | 0.952861  |
| 32 | 8  | 0 | 3.863378  | 3.088941  | -1.483354 |
| 33 | 6  | 0 | 5.766665  | 0.579403  | 0.686027  |
| 34 | 6  | 0 | 5.645299  | 0.604531  | -1.744390 |
| 35 | 6  | 0 | 6.840030  | -0.297548 | 0.609630  |
| 36 | 1  | 0 | 5.382638  | 0.932987  | 1.641357  |
| 37 | 6  | 0 | 6.712025  | -0.276925 | -1.797416 |
| 38 | 1  | 0 | 5.173971  | 0.974048  | -2.653657 |
| 39 | 6  | 0 | 7.323231  | -0.739841 | -0.625532 |
| 40 | 1  | 0 | 7.316530  | -0.648731 | 1.524592  |
| 41 | 1  | 0 | 7.085494  | -0.617533 | -2.763060 |
| 42 | 6  | 0 | 8.490653  | -1.674249 | -0.702438 |
| 43 | 1  | 0 | 9.407641  | -1.132968 | -0.974401 |
| 44 | 1  | 0 | 8.674746  | -2.171928 | 0.256531  |
| 45 | 1  | 0 | 8.337049  | -2.447262 | -1.465812 |

-----

Zero-point correction= 0.241094 (Hartree/Particle)  
Thermal correction to Energy= 0.281256  
Thermal correction to Enthalpy= 0.282200  
Thermal correction to Gibbs Free Energy= 0.156217  
Sum of electronic and zero-point Energies= -1884.533609  
Sum of electronic and thermal Energies= -1884.493447  
Sum of electronic and thermal Enthalpies= -1884.492503  
Sum of electronic and thermal Free Energies= -1884.618486

$\kappa^1\text{N-INT1}$  (singlet)

-----

| Center<br>Number | Atomic<br>Number | Atomic<br>Type | Coordinates (Angstroms) |           |           |
|------------------|------------------|----------------|-------------------------|-----------|-----------|
|                  |                  |                | X                       | Y         | Z         |
| 1                | 29               | 0              | -0.956624               | 0.679216  | 0.112272  |
| 2                | 7                | 0              | 0.538910                | -0.293988 | 1.613102  |
| 3                | 7                | 0              | 1.688584                | -0.734840 | 1.032017  |
| 4                | 7                | 0              | -0.483297               | -0.859014 | -1.106022 |
| 5                | 7                | 0              | 0.825577                | -1.171039 | -1.289732 |
| 6                | 7                | 0              | 0.648021                | 1.724363  | -0.511221 |
| 7                | 7                | 0              | 1.828180                | 1.081106  | -0.700814 |
| 8                | 6                | 0              | 0.604763                | -0.648942 | 2.882356  |
| 9                | 6                | 0              | 1.792489                | -1.333894 | 3.169648  |
| 10               | 6                | 0              | 2.447874                | -1.363941 | 1.954031  |
| 11               | 6                | 0              | -1.201178               | -1.728646 | -1.801591 |
| 12               | 6                | 0              | -0.374087               | -2.637347 | -2.464794 |
| 13               | 6                | 0              | 0.903468                | -2.244308 | -2.101885 |
| 14               | 6                | 0              | 0.860026                | 3.015654  | -0.715288 |
| 15               | 6                | 0              | 2.198905                | 3.251571  | -1.039322 |
| 16               | 6                | 0              | 2.773217                | 1.992173  | -1.008579 |
| 17               | 5                | 0              | 1.936136                | -0.447739 | -0.466165 |
| 18               | 1                | 0              | 3.004436                | -0.831746 | -0.813525 |
| 19               | 35               | 0              | 2.370311                | -2.049852 | 4.834169  |
| 20               | 35               | 0              | 4.136006                | -2.158297 | 1.563643  |
| 21               | 35               | 0              | -0.800967               | -0.222060 | 4.099062  |
| 22               | 35               | 0              | 2.541813                | -3.064776 | -2.611215 |

|    |    |   |           |           |           |
|----|----|---|-----------|-----------|-----------|
| 23 | 35 | 0 | -0.879796 | -4.074107 | -3.600824 |
| 24 | 35 | 0 | -3.102303 | -1.666667 | -1.789995 |
| 25 | 35 | 0 | 4.602856  | 1.550057  | -1.289688 |
| 26 | 35 | 0 | 3.034807  | 4.911470  | -1.434630 |
| 27 | 35 | 0 | -0.563513 | 4.261121  | -0.546156 |
| 28 | 7  | 0 | -2.607215 | 0.878356  | 0.824448  |
| 29 | 16 | 0 | -3.724237 | 1.767037  | 0.044776  |
| 30 | 6  | 0 | -5.288371 | 1.032117  | 0.380475  |
| 31 | 8  | 0 | -3.587671 | 1.925568  | -1.393578 |
| 32 | 8  | 0 | -3.488624 | 2.915425  | 0.952539  |
| 33 | 6  | 0 | -6.131588 | 0.697014  | -0.673979 |
| 34 | 6  | 0 | -5.644017 | 0.786334  | 1.707659  |
| 35 | 6  | 0 | -7.353778 | 0.101624  | -0.387901 |
| 36 | 1  | 0 | -5.824009 | 0.905317  | -1.696817 |
| 37 | 6  | 0 | -6.867594 | 0.194939  | 1.970044  |
| 38 | 1  | 0 | -4.960877 | 1.052553  | 2.511950  |
| 39 | 6  | 0 | -7.737978 | -0.156710 | 0.929751  |
| 40 | 1  | 0 | -8.024524 | -0.169937 | -1.202477 |
| 41 | 1  | 0 | -7.158874 | -0.008125 | 3.000521  |
| 42 | 6  | 0 | -9.061194 | -0.786854 | 1.237081  |
| 43 | 1  | 0 | -9.765610 | -0.045747 | 1.639757  |
| 44 | 1  | 0 | -9.518674 | -1.225629 | 0.343059  |
| 45 | 1  | 0 | -8.961813 | -1.576254 | 1.992908  |

-----

Zero-point correction= 0.240665 (Hartree/Particle)  
Thermal correction to Energy= 0.280798  
Thermal correction to Enthalpy= 0.281742  
Thermal correction to Gibbs Free Energy= 0.156337  
Sum of electronic and zero-point Energies= -1884.513326  
Sum of electronic and thermal Energies= -1884.473193  
Sum of electronic and thermal Enthalpies= -1884.472249  
Sum of electronic and thermal Free Energies= -1884.597654

**k<sup>1</sup>N-INT1 (open-shell singlet)**

-----

| Center Number | Atomic Number | Atomic Type | Coordinates (Angstroms) |           |           |
|---------------|---------------|-------------|-------------------------|-----------|-----------|
|               |               |             | X                       | Y         | Z         |
| 1             | 29            | 0           | 0.942855                | 0.394143  | -0.551207 |
| 2             | 7             | 0           | -0.451413               | -0.794857 | -1.584549 |
| 3             | 7             | 0           | -1.636982               | -1.022727 | -0.960762 |
| 4             | 7             | 0           | 0.465158                | -0.722020 | 1.160046  |
| 5             | 7             | 0           | -0.857142               | -0.887633 | 1.427305  |
| 6             | 7             | 0           | -0.617717               | 1.712666  | -0.118150 |
| 7             | 7             | 0           | -1.792828               | 1.161131  | 0.285508  |
| 8             | 6             | 0           | -0.476919               | -1.470338 | -2.721184 |
| 9             | 6             | 0           | -1.682865               | -2.161356 | -2.872644 |
| 10            | 6             | 0           | -2.385629               | -1.844417 | -1.723614 |
| 11            | 6             | 0           | 1.134100                | -1.282762 | 2.153603  |
| 12            | 6             | 0           | 0.265937                | -1.827630 | 3.103958  |
| 13            | 6             | 0           | -0.990429               | -1.549843 | 2.594116  |
| 14            | 6             | 0           | -0.797397               | 3.023071  | -0.172024 |
| 15            | 6             | 0           | -2.102374               | 3.363711  | 0.199698  |
| 16            | 6             | 0           | -2.694495               | 2.145046  | 0.479824  |
| 17            | 5             | 0           | -1.923410               | -0.375615 | 0.420972  |
| 18            | 1             | 0           | -3.012472               | -0.664698 | 0.790641  |
| 19            | 35            | 0           | -2.229942               | -3.276105 | -4.311878 |
| 20            | 35            | 0           | -4.124835               | -2.440422 | -1.229282 |
| 21            | 35            | 0           | 1.008497                | -1.424859 | -3.912843 |
| 22            | 35            | 0           | -2.674077               | -1.997138 | 3.360433  |
| 23            | 35            | 0           | 0.701592                | -2.734098 | 4.716758  |
| 24            | 35            | 0           | 3.038485                | -1.307009 | 2.155648  |
| 25            | 35            | 0           | -4.485393               | 1.832009  | 1.046494  |
| 26            | 35            | 0           | -2.882943               | 5.094020  | 0.282806  |
| 27            | 35            | 0           | 0.609645                | 4.177753  | -0.714861 |
| 28            | 7             | 0           | 2.595752                | 1.022112  | -0.901365 |
| 29            | 16            | 0           | 3.752483                | 2.090531  | -0.394835 |
| 30            | 6             | 0           | 5.167551                | 1.041976  | -0.462130 |

|    |   |   |          |           |           |
|----|---|---|----------|-----------|-----------|
| 31 | 8 | 0 | 3.483950 | 2.440293  | 0.995084  |
| 32 | 8 | 0 | 3.853432 | 3.123128  | -1.418892 |
| 33 | 6 | 0 | 5.742214 | 0.578884  | 0.719247  |
| 34 | 6 | 0 | 5.657720 | 0.656262  | -1.712422 |
| 35 | 6 | 0 | 6.827811 | -0.281541 | 0.640528  |
| 36 | 1 | 0 | 5.341061 | 0.908846  | 1.675877  |
| 37 | 6 | 0 | 6.736984 | -0.208549 | -1.768308 |
| 38 | 1 | 0 | 5.194672 | 1.039648  | -2.620053 |
| 39 | 6 | 0 | 7.335785 | -0.690439 | -0.597067 |
| 40 | 1 | 0 | 7.295409 | -0.646551 | 1.554687  |
| 41 | 1 | 0 | 7.130207 | -0.522398 | -2.735133 |
| 42 | 6 | 0 | 8.514707 | -1.609367 | -0.676526 |
| 43 | 1 | 0 | 9.425560 | -1.054883 | -0.942743 |
| 44 | 1 | 0 | 8.702343 | -2.111426 | 0.279420  |
| 45 | 1 | 0 | 8.372744 | -2.378728 | -1.445941 |

-----

Zero-point correction= 0.240852 (Hartree/Particle)  
 Thermal correction to Energy= 0.281067  
 Thermal correction to Enthalpy= 0.282011  
 Thermal correction to Gibbs Free Energy= 0.156587  
 Sum of electronic and zero-point Energies= -1884.514886  
 Sum of electronic and thermal Energies= -1884.474672  
 Sum of electronic and thermal Enthalpies= -1884.473727  
 Sum of electronic and thermal Free Energies= -1884.599151

#### Benzene

-----

| Center<br>Number | Atomic<br>Number | Atomic<br>Type | Coordinates (Angstroms) |           |           |
|------------------|------------------|----------------|-------------------------|-----------|-----------|
|                  |                  |                | X                       | Y         | Z         |
| 1                | 6                | 0              | 1.240939                | 0.629721  | -0.000001 |
| 2                | 6                | 0              | 1.165891                | -0.759793 | -0.000009 |
| 3                | 6                | 0              | -0.075125               | -1.389292 | 0.000012  |
| 4                | 6                | 0              | -1.240951               | -0.629697 | -0.000002 |
| 5                | 6                | 0              | -1.165905               | 0.759771  | -0.000013 |
| 6                | 6                | 0              | 0.075152                | 1.389291  | 0.000007  |
| 7                | 1                | 0              | 2.211888                | 1.122775  | 0.000010  |
| 8                | 1                | 0              | 2.078218                | -1.354273 | -0.000008 |
| 9                | 1                | 0              | -0.133690               | -2.476629 | 0.000028  |
| 10               | 1                | 0              | -2.211864               | -1.122821 | -0.000001 |
| 11               | 1                | 0              | -2.078190               | 1.354315  | -0.000009 |
| 12               | 1                | 0              | 0.133639                | 2.476632  | 0.000007  |

-----

Zero-point correction= 0.100123 (Hartree/Particle)  
 Thermal correction to Energy= 0.104555  
 Thermal correction to Enthalpy= 0.105499  
 Thermal correction to Gibbs Free Energy= 0.072649  
 Sum of electronic and zero-point Energies= -231.955296  
 Sum of electronic and thermal Energies= -231.950864  
 Sum of electronic and thermal Enthalpies= -231.949920  
 Sum of electronic and thermal Free Energies= -231.982770

#### <sup>3</sup>TS1

-----

| Center<br>Number | Atomic<br>Number | Atomic<br>Type | Coordinates (Angstroms) |           |           |
|------------------|------------------|----------------|-------------------------|-----------|-----------|
|                  |                  |                | X                       | Y         | Z         |
| 1                | 5                | 0              | 1.792091                | 0.892265  | -0.018750 |
| 2                | 1                | 0              | 2.893519                | 1.316629  | 0.115333  |
| 3                | 7                | 0              | 1.104542                | 0.776947  | 1.371178  |
| 4                | 6                | 0              | 1.556941                | 1.059912  | 2.607520  |
| 5                | 6                | 0              | 0.537872                | 0.849634  | 3.519649  |
| 6                | 6                | 0              | -0.538756               | 0.435194  | 2.728089  |
| 7                | 7                | 0              | 1.830387                | -0.498130 | -0.692718 |
| 8                | 6                | 0              | 2.851596                | -1.370332 | -0.816082 |
| 9                | 6                | 0              | 1.112749                | -2.130442 | -1.896189 |

|    |    |   |           |           |           |
|----|----|---|-----------|-----------|-----------|
| 10 | 6  | 0 | 2.442360  | -2.439499 | -1.588481 |
| 11 | 7  | 0 | 0.941527  | 1.874071  | -0.877176 |
| 12 | 6  | 0 | 1.268381  | 3.069647  | -1.410886 |
| 13 | 6  | 0 | 0.142236  | 3.641266  | -1.975878 |
| 14 | 6  | 0 | -0.864246 | 2.703313  | -1.731747 |
| 15 | 7  | 0 | -0.387055 | 1.655294  | -1.080740 |
| 16 | 7  | 0 | 0.740098  | -0.985370 | -1.347449 |
| 17 | 7  | 0 | -0.193675 | 0.382665  | 1.448383  |
| 18 | 29 | 0 | -1.130255 | -0.115068 | -0.403545 |
| 19 | 7  | 0 | -2.163998 | -1.582349 | 0.394229  |
| 20 | 16 | 0 | -3.144035 | -1.786451 | -0.907618 |
| 21 | 8  | 0 | -2.665821 | -0.665361 | -1.794981 |
| 22 | 8  | 0 | -3.218481 | -3.134277 | -1.454211 |
| 23 | 6  | 0 | -4.741641 | -1.317550 | -0.317616 |
| 24 | 6  | 0 | -4.946542 | -0.010861 | 0.128538  |
| 25 | 6  | 0 | -5.757935 | -2.264027 | -0.280716 |
| 26 | 6  | 0 | -6.194814 | 0.341421  | 0.611707  |
| 27 | 1  | 0 | -4.135718 | 0.716743  | 0.094862  |
| 28 | 6  | 0 | -7.005877 | -1.888079 | 0.202532  |
| 29 | 1  | 0 | -5.566622 | -3.274029 | -0.636703 |
| 30 | 6  | 0 | -7.241844 | -0.589166 | 0.654029  |
| 31 | 1  | 0 | -6.370141 | 1.357896  | 0.964678  |
| 32 | 1  | 0 | -7.814244 | -2.618238 | 0.231500  |
| 33 | 6  | 0 | -8.587705 | -0.181160 | 1.169683  |
| 34 | 1  | 0 | -9.056324 | 0.560008  | 0.507910  |
| 35 | 1  | 0 | -9.268538 | -1.036487 | 1.246652  |
| 36 | 1  | 0 | -8.510336 | 0.281280  | 2.162441  |
| 37 | 35 | 0 | 3.324883  | 1.669206  | 2.962552  |
| 38 | 35 | 0 | 0.591728  | 1.091910  | 5.404219  |
| 39 | 35 | 0 | -2.297896 | 0.027526  | 3.328584  |
| 40 | 35 | 0 | -2.705147 | 2.827583  | -2.193072 |
| 41 | 35 | 0 | -0.002377 | 5.313175  | -2.866907 |
| 42 | 35 | 0 | 3.017581  | 3.814743  | -1.354630 |
| 43 | 35 | 0 | 4.542228  | -1.125568 | 0.029452  |
| 44 | 35 | 0 | 3.464644  | -3.952176 | -2.121285 |
| 45 | 35 | 0 | -0.070743 | -3.114583 | -3.014234 |
| 46 | 1  | 0 | -1.397574 | -2.558210 | 0.526359  |
| 47 | 6  | 0 | 0.612620  | -5.538982 | 0.297488  |
| 48 | 6  | 0 | 1.692106  | -5.145163 | 1.084548  |
| 49 | 6  | 0 | 1.712827  | -3.888381 | 1.683522  |
| 50 | 6  | 0 | 0.645741  | -3.007736 | 1.493457  |
| 51 | 6  | 0 | -0.398396 | -3.433786 | 0.696179  |
| 52 | 6  | 0 | -0.461675 | -4.671665 | 0.090110  |
| 53 | 1  | 0 | 0.607000  | -6.522526 | -0.170539 |
| 54 | 1  | 0 | 2.530055  | -5.825002 | 1.228893  |
| 55 | 1  | 0 | 2.557750  | -3.588966 | 2.302803  |
| 56 | 1  | 0 | 0.644314  | -2.018330 | 1.953236  |
| 57 | 1  | 0 | -1.307551 | -4.951552 | -0.535861 |

-----

Zero-point correction= 0.335963 (Hartree/Particle)  
Thermal correction to Energy= 0.381187  
Thermal correction to Enthalpy= 0.382131  
Thermal correction to Gibbs Free Energy= 0.247600  
Sum of electronic and zero-point Energies= -2116.472610  
Sum of electronic and thermal Energies= -2116.427386  
Sum of electronic and thermal Enthalpies= -2116.426441  
Sum of electronic and thermal Free Energies= -2116.560973

<sup>3</sup>INT2

-----

| Center<br>Number | Atomic<br>Number | Atomic<br>Type | Coordinates (Angstroms) |           |          |
|------------------|------------------|----------------|-------------------------|-----------|----------|
|                  |                  |                | X                       | Y         | Z        |
| 1                | 5                | 0              | 1.544177                | 0.818147  | 0.747138 |
| 2                | 1                | 0              | 2.532353                | 1.123541  | 1.331653 |
| 3                | 7                | 0              | 0.647258                | -0.056668 | 1.664278 |
| 4                | 6                | 0              | 0.948462                | -0.707236 | 2.804432 |
| 5                | 6                | 0              | -0.172279               | -1.388329 | 3.245067 |

|    |    |   |           |           |           |
|----|----|---|-----------|-----------|-----------|
| 6  | 6  | 0 | -1.139776 | -1.096652 | 2.277702  |
| 7  | 7  | 0 | 1.887830  | 0.029909  | -0.539284 |
| 8  | 6  | 0 | 3.061449  | -0.409263 | -1.036096 |
| 9  | 6  | 0 | 1.459125  | -0.859564 | -2.452789 |
| 10 | 6  | 0 | 2.840173  | -0.986296 | -2.273259 |
| 11 | 7  | 0 | 0.744635  | 2.094332  | 0.352556  |
| 12 | 6  | 0 | 1.050523  | 3.393686  | 0.545550  |
| 13 | 6  | 0 | 0.017904  | 4.181567  | 0.072515  |
| 14 | 6  | 0 | -0.911081 | 3.258198  | -0.414710 |
| 15 | 7  | 0 | -0.474593 | 2.017376  | -0.253410 |
| 16 | 7  | 0 | 0.894866  | -0.257980 | -1.420038 |
| 17 | 7  | 0 | -0.646279 | -0.310798 | 1.332999  |
| 18 | 29 | 0 | -1.130724 | 0.144755  | -0.720266 |
| 19 | 7  | 0 | -1.962546 | -1.594113 | -1.131648 |
| 20 | 16 | 0 | -3.026026 | -0.971313 | -2.198516 |
| 21 | 8  | 0 | -2.627278 | 0.484952  | -2.178728 |
| 22 | 8  | 0 | -3.104325 | -1.658684 | -3.478629 |
| 23 | 6  | 0 | -4.603599 | -1.043024 | -1.404946 |
| 24 | 6  | 0 | -4.960720 | -0.054472 | -0.489679 |
| 25 | 6  | 0 | -5.441583 | -2.119340 | -1.671141 |
| 26 | 6  | 0 | -6.179596 | -0.155468 | 0.162740  |
| 27 | 1  | 0 | -4.290990 | 0.784049  | -0.302086 |
| 28 | 6  | 0 | -6.659258 | -2.202408 | -1.007379 |
| 29 | 1  | 0 | -5.145124 | -2.871532 | -2.399281 |
| 30 | 6  | 0 | -7.044095 | -1.227711 | -0.084642 |
| 31 | 1  | 0 | -6.474606 | 0.613103  | 0.877577  |
| 32 | 1  | 0 | -7.328357 | -3.037949 | -1.211359 |
| 33 | 6  | 0 | -8.360679 | -1.310742 | 0.626090  |
| 34 | 1  | 0 | -9.000385 | -0.453904 | 0.374864  |
| 35 | 1  | 0 | -8.907054 | -2.223803 | 0.363419  |
| 36 | 1  | 0 | -8.227207 | -1.299269 | 1.716001  |
| 37 | 35 | 0 | 2.677890  | -0.692547 | 3.598753  |
| 38 | 35 | 0 | -0.337342 | -2.495286 | 4.781130  |
| 39 | 35 | 0 | -2.945934 | -1.692361 | 2.244873  |
| 40 | 35 | 0 | -2.600717 | 3.640275  | -1.194832 |
| 41 | 35 | 0 | -0.105712 | 6.077348  | 0.083242  |
| 42 | 35 | 0 | 2.676138  | 3.996601  | 1.329175  |
| 43 | 35 | 0 | 4.719951  | -0.247099 | -0.115780 |
| 44 | 35 | 0 | 4.118256  | -1.768843 | -3.442889 |
| 45 | 35 | 0 | 0.406764  | -1.431003 | -3.935687 |
| 46 | 1  | 0 | -1.326956 | -2.232587 | -1.632016 |
| 47 | 6  | 0 | 2.927851  | -4.422812 | -0.908206 |
| 48 | 6  | 0 | 2.905998  | -4.088813 | 0.444457  |
| 49 | 6  | 0 | 1.758157  | -3.553498 | 1.025711  |
| 50 | 6  | 0 | 0.616551  | -3.330660 | 0.248569  |
| 51 | 6  | 0 | 0.701464  | -3.662684 | -1.082039 |
| 52 | 6  | 0 | 1.797211  | -4.210286 | -1.704347 |
| 53 | 1  | 0 | 3.827815  | -4.848146 | -1.351817 |
| 54 | 1  | 0 | 3.791778  | -4.254321 | 1.055447  |
| 55 | 1  | 0 | 1.742157  | -3.313414 | 2.090159  |
| 56 | 1  | 0 | -0.295038 | -2.917794 | 0.681709  |
| 57 | 1  | 0 | 1.804243  | -4.453275 | -2.766473 |

-----

Zero-point correction= 0.342554 (Hartree/Particle)  
Thermal correction to Energy= 0.388173  
Thermal correction to Enthalpy= 0.389117  
Thermal correction to Gibbs Free Energy= 0.253002  
Sum of electronic and zero-point Energies= -2116.483634  
Sum of electronic and thermal Energies= -2116.438015  
Sum of electronic and thermal Enthalpies= -2116.437071  
Sum of electronic and thermal Free Energies= -2116.573186

<sup>1</sup>TS2

-----

| Center<br>Number | Atomic<br>Number | Atomic<br>Type | Coordinates (Angstroms) |          |          |
|------------------|------------------|----------------|-------------------------|----------|----------|
|                  |                  |                | X                       | Y        | Z        |
| 1                | 5                | 0              | -2.128450               | 0.110757 | 0.589143 |

-----

|    |    |   |           |           |           |
|----|----|---|-----------|-----------|-----------|
| 2  | 1  | 0 | -3.172358 | 0.222887  | 1.142310  |
| 3  | 7  | 0 | -1.004023 | -0.119526 | 1.641651  |
| 4  | 6  | 0 | -1.072647 | -0.166663 | 2.988308  |
| 5  | 6  | 0 | 0.177186  | -0.475144 | 3.493875  |
| 6  | 6  | 0 | 0.969591  | -0.606164 | 2.348787  |
| 7  | 7  | 0 | -1.831316 | 1.391981  | -0.223755 |
| 8  | 6  | 0 | -2.541797 | 2.533042  | -0.351119 |
| 9  | 6  | 0 | -0.724741 | 2.663460  | -1.556784 |
| 10 | 6  | 0 | -1.868450 | 3.388502  | -1.202616 |
| 11 | 7  | 0 | -2.164802 | -1.113683 | -0.363620 |
| 12 | 6  | 0 | -3.150407 | -2.007345 | -0.590162 |
| 13 | 6  | 0 | -2.700025 | -2.962325 | -1.482308 |
| 14 | 6  | 0 | -1.387418 | -2.564824 | -1.754663 |
| 15 | 7  | 0 | -1.070279 | -1.464616 | -1.093383 |
| 16 | 7  | 0 | -0.702777 | 1.478673  | -0.974946 |
| 17 | 7  | 0 | 0.268934  | -0.389923 | 1.249183  |
| 18 | 29 | 0 | 0.639798  | -0.264721 | -0.871165 |
| 19 | 7  | 0 | 2.377860  | 0.806695  | -0.725274 |
| 20 | 16 | 0 | 3.129494  | 0.039662  | -1.973937 |
| 21 | 8  | 0 | 1.958109  | -0.820653 | -2.350020 |
| 22 | 8  | 0 | 3.742112  | 0.903706  | -2.973245 |
| 23 | 6  | 0 | 4.367234  | -1.077826 | -1.378118 |
| 24 | 6  | 0 | 3.978696  | -2.307584 | -0.848807 |
| 25 | 6  | 0 | 5.704120  | -0.694482 | -1.405378 |
| 26 | 6  | 0 | 4.951391  | -3.157865 | -0.345996 |
| 27 | 1  | 0 | 2.928557  | -2.596948 | -0.845189 |
| 28 | 6  | 0 | 6.662604  | -1.559189 | -0.892926 |
| 29 | 1  | 0 | 5.988906  | 0.263348  | -1.835711 |
| 30 | 6  | 0 | 6.303581  | -2.798265 | -0.358803 |
| 31 | 1  | 0 | 4.658704  | -4.124270 | 0.064992  |
| 32 | 1  | 0 | 7.713161  | -1.270011 | -0.911697 |
| 33 | 6  | 0 | 7.341459  | -3.742357 | 0.166667  |
| 34 | 1  | 0 | 8.295622  | -3.234787 | 0.349997  |
| 35 | 1  | 0 | 7.018733  | -4.212024 | 1.104381  |
| 36 | 1  | 0 | 7.532488  | -4.553852 | -0.549234 |
| 37 | 35 | 0 | -2.668161 | 0.153579  | 3.978987  |
| 38 | 35 | 0 | 0.688699  | -0.687120 | 5.313939  |
| 39 | 35 | 0 | 2.812811  | -1.098051 | 2.270349  |
| 40 | 35 | 0 | -0.128974 | -3.434966 | -2.889013 |
| 41 | 35 | 0 | -3.644440 | -4.461004 | -2.173069 |
| 42 | 35 | 0 | -4.869883 | -1.922233 | 0.225368  |
| 43 | 35 | 0 | -4.196673 | 2.852919  | 0.540337  |
| 44 | 35 | 0 | -2.380458 | 5.132458  | -1.764545 |
| 45 | 35 | 0 | 0.670603  | 3.208218  | -2.740504 |
| 46 | 6  | 0 | 5.892064  | 3.447321  | -0.163984 |
| 47 | 6  | 0 | 5.862568  | 3.553637  | 1.225253  |
| 48 | 6  | 0 | 4.795384  | 3.038521  | 1.959844  |
| 49 | 6  | 0 | 3.745136  | 2.403863  | 1.304079  |
| 50 | 6  | 0 | 3.791988  | 2.347495  | -0.078481 |
| 51 | 6  | 0 | 4.851223  | 2.814102  | -0.840703 |
| 52 | 1  | 0 | 6.727587  | 3.860548  | -0.726542 |
| 53 | 1  | 0 | 6.687415  | 4.039365  | 1.743820  |
| 54 | 1  | 0 | 4.786173  | 3.121439  | 3.044933  |
| 55 | 1  | 0 | 2.903880  | 1.971791  | 1.842706  |
| 56 | 1  | 0 | 2.769902  | 2.047013  | -0.662304 |
| 57 | 1  | 0 | 4.844774  | 2.709950  | -1.924819 |

---

Zero-point correction= 0.336697 (Hartree/Particle)  
 Thermal correction to Energy= 0.382551  
 Thermal correction to Enthalpy= 0.383495  
 Thermal correction to Gibbs Free Energy= 0.244552  
 Sum of electronic and zero-point Energies= -2116.468630  
 Sum of electronic and thermal Energies= -2116.422776  
 Sum of electronic and thermal Enthalpies= -2116.421832  
 Sum of electronic and thermal Free Energies= -2116.560774

!INT3

---

| Center<br>Number | Atomic<br>Number | Atomic<br>Type | Coordinates (Angstroms) |           |           |
|------------------|------------------|----------------|-------------------------|-----------|-----------|
|                  |                  |                | X                       | Y         | Z         |
| 1                | 5                | 0              | -1.764441               | -0.567210 | 0.577386  |
| 2                | 1                | 0              | -2.775265               | -0.979171 | 1.041456  |
| 3                | 7                | 0              | -0.597981               | -0.932866 | 1.525555  |
| 4                | 6                | 0              | -0.657427               | -1.558000 | 2.720058  |
| 5                | 6                | 0              | 0.615860                | -1.642709 | 3.247373  |
| 6                | 6                | 0              | 1.409678                | -1.026352 | 2.276373  |
| 7                | 7                | 0              | -1.867628               | 0.969120  | 0.422206  |
| 8                | 6                | 0              | -2.901328               | 1.791263  | 0.704288  |
| 9                | 6                | 0              | -1.284232               | 2.934980  | -0.206565 |
| 10               | 6                | 0              | -2.572665               | 3.076245  | 0.318191  |
| 11               | 7                | 0              | -1.549293               | -1.216021 | -0.812409 |
| 12               | 6                | 0              | -2.370632               | -2.036427 | -1.501014 |
| 13               | 6                | 0              | -1.827717               | -2.276638 | -2.748079 |
| 14               | 6                | 0              | -0.643391               | -1.535859 | -2.738050 |
| 15               | 7                | 0              | -0.468700               | -0.906564 | -1.584448 |
| 16               | 7                | 0              | -0.857413               | 1.686130  | -0.141311 |
| 17               | 7                | 0              | 0.694280                | -0.600085 | 1.245398  |
| 18               | 29               | 0              | 0.898818                | 0.439825  | -0.726980 |
| 19               | 7                | 0              | 2.406405                | 1.742995  | -1.385228 |
| 20               | 16               | 0              | 3.741783                | 1.003599  | -2.296231 |
| 21               | 8                | 0              | 3.091419                | 0.615483  | -3.535154 |
| 22               | 8                | 0              | 4.871068                | 1.917646  | -2.288037 |
| 23               | 6                | 0              | 4.173629                | -0.424063 | -1.353753 |
| 24               | 6                | 0              | 3.370389                | -1.561636 | -1.427673 |
| 25               | 6                | 0              | 5.372094                | -0.422326 | -0.647892 |
| 26               | 6                | 0              | 3.773589                | -2.707100 | -0.760245 |
| 27               | 1                | 0              | 2.457101                | -1.554469 | -2.022222 |
| 28               | 6                | 0              | 5.759932                | -1.584828 | 0.006829  |
| 29               | 1                | 0              | 5.993193                | 0.470416  | -0.633677 |
| 30               | 6                | 0              | 4.968581                | -2.734891 | -0.032829 |
| 31               | 1                | 0              | 3.155011                | -3.603004 | -0.808965 |
| 32               | 1                | 0              | 6.699082                | -1.602137 | 0.559753  |
| 33               | 6                | 0              | 5.365886                | -3.964907 | 0.721331  |
| 34               | 1                | 0              | 6.446158                | -3.999324 | 0.904354  |
| 35               | 1                | 0              | 4.865367                | -3.992024 | 1.700396  |
| 36               | 1                | 0              | 5.078178                | -4.878137 | 0.186395  |
| 37               | 35               | 0              | -2.264005               | -2.213902 | 3.509626  |
| 38               | 35               | 0              | 1.147732                | -2.411874 | 4.903624  |
| 39               | 35               | 0              | 3.301600                | -0.785574 | 2.373822  |
| 40               | 35               | 0              | 0.601528                | -1.364248 | -4.166661 |
| 41               | 35               | 0              | -2.525051               | -3.357363 | -4.148586 |
| 42               | 35               | 0              | -4.011133               | -2.726940 | -0.820409 |
| 43               | 35               | 0              | -4.528492               | 1.222363  | 1.517365  |
| 44               | 35               | 0              | -3.625688               | 4.652601  | 0.465734  |
| 45               | 35               | 0              | -0.212521               | 4.321305  | -0.968491 |
| 46               | 6                | 0              | 3.693902                | 4.919656  | 0.108247  |
| 47               | 6                | 0              | 3.485258                | 4.675084  | 1.464007  |
| 48               | 6                | 0              | 2.945647                | 3.462278  | 1.876400  |
| 49               | 6                | 0              | 2.609384                | 2.494635  | 0.935136  |
| 50               | 6                | 0              | 2.819201                | 2.742535  | -0.414324 |
| 51               | 6                | 0              | 3.366085                | 3.954722  | -0.834404 |
| 52               | 1                | 0              | 4.112572                | 5.869361  | -0.218859 |
| 53               | 1                | 0              | 3.738624                | 5.436736  | 2.199076  |
| 54               | 1                | 0              | 2.771717                | 3.265548  | 2.932686  |
| 55               | 1                | 0              | 2.147891                | 1.557846  | 1.239922  |
| 56               | 1                | 0              | 1.883516                | 2.200777  | -2.144495 |
| 57               | 1                | 0              | 3.527977                | 4.140289  | -1.894677 |

-----

Zero-point correction= 0.346044 (Hartree/Particle)  
Thermal correction to Energy= 0.391211  
Thermal correction to Enthalpy= 0.392155  
Thermal correction to Gibbs Free Energy= 0.258015  
Sum of electronic and zero-point Energies= -2116.601882  
Sum of electronic and thermal Energies= -2116.556716  
Sum of electronic and thermal Enthalpies= -2116.555771  
Sum of electronic and thermal Free Energies= -2116.689912

**<sup>3</sup>TS3**

| Center<br>Number | Atomic<br>Number | Atomic<br>Type | Coordinates (Angstroms) |           |           |
|------------------|------------------|----------------|-------------------------|-----------|-----------|
|                  |                  |                | X                       | Y         | Z         |
| 1                | 5                | 0              | -1.782963               | -0.117756 | -0.971521 |
| 2                | 1                | 0              | -2.743342               | -0.361001 | -1.628645 |
| 3                | 7                | 0              | -0.527989               | -0.784508 | -1.596231 |
| 4                | 6                | 0              | -0.437293               | -1.854925 | -2.410827 |
| 5                | 6                | 0              | 0.893814                | -2.085575 | -2.704942 |
| 6                | 6                | 0              | 1.567232                | -1.088925 | -1.991460 |
| 7                | 7                | 0              | -1.992759               | -0.658601 | 0.472328  |
| 8                | 6                | 0              | -3.051926               | -1.263270 | 1.047704  |
| 9                | 6                | 0              | -1.530199               | -0.862418 | 2.565916  |
| 10               | 6                | 0              | -2.799551               | -1.425684 | 2.398877  |
| 11               | 7                | 0              | -1.566362               | 1.417399  | -0.878925 |
| 12               | 6                | 0              | -2.319079               | 2.426404  | -1.367356 |
| 13               | 6                | 0              | -1.773299               | 3.633625  | -0.973185 |
| 14               | 6                | 0              | -0.657765               | 3.261856  | -0.217539 |
| 15               | 7                | 0              | -0.538301               | 1.946145  | -0.155555 |
| 16               | 7                | 0              | -1.047621               | -0.414637 | 1.418108  |
| 17               | 7                | 0              | 0.722213                | -0.316484 | -1.329954 |
| 18               | 29               | 0              | 0.743789                | 0.576633  | 0.710855  |
| 19               | 7                | 0              | 2.283072                | -0.527753 | 1.215152  |
| 20               | 16               | 0              | 2.890606                | 0.541762  | 2.312849  |
| 21               | 8                | 0              | 1.857522                | 1.631012  | 2.293880  |
| 22               | 8                | 0              | 3.300609                | -0.005691 | 3.601816  |
| 23               | 6                | 0              | 4.313501                | 1.161999  | 1.465773  |
| 24               | 6                | 0              | 4.145303                | 2.128564  | 0.475752  |
| 25               | 6                | 0              | 5.555043                | 0.583261  | 1.708554  |
| 26               | 6                | 0              | 5.245925                | 2.526248  | -0.266526 |
| 27               | 1                | 0              | 3.160002                | 2.559639  | 0.300160  |
| 28               | 6                | 0              | 6.644662                | 0.991175  | 0.950795  |
| 29               | 1                | 0              | 5.661654                | -0.165806 | 2.491151  |
| 30               | 6                | 0              | 6.507732                | 1.964333  | -0.043069 |
| 31               | 1                | 0              | 5.127978                | 3.284457  | -1.040834 |
| 32               | 1                | 0              | 7.624646                | 0.549629  | 1.131767  |
| 33               | 6                | 0              | 7.690592                | 2.419058  | -0.842092 |
| 34               | 1                | 0              | 8.506746                | 1.687845  | -0.809529 |
| 35               | 1                | 0              | 7.425109                | 2.588661  | -1.893094 |
| 36               | 1                | 0              | 8.085740                | 3.368609  | -0.454218 |
| 37               | 35               | 0              | -1.938672               | -2.890289 | -2.960678 |
| 38               | 35               | 0              | 1.628249                | -3.456800 | -3.801077 |
| 39               | 35               | 0              | 3.448816                | -0.791041 | -1.941717 |
| 40               | 35               | 0              | 0.588612                | 4.415166  | 0.640278  |
| 41               | 35               | 0              | -2.395359               | 5.386303  | -1.363576 |
| 42               | 35               | 0              | -3.888935               | 2.173361  | -2.412715 |
| 43               | 35               | 0              | -4.627076               | -1.759232 | 0.098568  |
| 44               | 35               | 0              | -3.919783               | -2.213251 | 3.717213  |
| 45               | 35               | 0              | -0.542791               | -0.679843 | 4.184003  |
| 46               | 6                | 0              | 3.812025                | -3.635977 | 1.005725  |
| 47               | 6                | 0              | 2.929426                | -4.091787 | 0.013826  |
| 48               | 6                | 0              | 1.569263                | -3.761463 | 0.075620  |
| 49               | 6                | 0              | 1.098741                | -2.934135 | 1.073619  |
| 50               | 6                | 0              | 2.006262                | -2.348192 | 2.010258  |
| 51               | 6                | 0              | 3.358121                | -2.818037 | 2.015743  |
| 52               | 1                | 0              | 4.855058                | -3.946800 | 0.982450  |
| 53               | 1                | 0              | 3.293474                | -4.726850 | -0.792870 |
| 54               | 1                | 0              | 0.877971                | -4.180643 | -0.655717 |
| 55               | 1                | 0              | 0.040687                | -2.677801 | 1.123874  |
| 56               | 1                | 0              | 1.595577                | -1.958671 | 2.943966  |
| 57               | 1                | 0              | 4.024787                | -2.466394 | 2.801251  |

Zero-point correction= 0.341260 (Hartree/Particle)  
Thermal correction to Energy= 0.386571  
Thermal correction to Enthalpy= 0.387515  
Thermal correction to Gibbs Free Energy= 0.251436



Sum of electronic and zero-point Energies= -2116.486960  
 Sum of electronic and thermal Energies= -2116.441649  
 Sum of electronic and thermal Enthalpies= -2116.440705  
 Sum of electronic and thermal Free Energies= -2116.576785

**<sup>3</sup>INT4**

| Center<br>Number | Atomic<br>Number | Atomic<br>Type | Coordinates (Angstroms) |           |           |
|------------------|------------------|----------------|-------------------------|-----------|-----------|
|                  |                  |                | X                       | Y         | Z         |
| 1                | 5                | 0              | -1.953209               | -0.052559 | -0.809229 |
| 2                | 1                | 0              | -2.975177               | -0.227443 | -1.391502 |
| 3                | 7                | 0              | -0.812913               | -0.841736 | -1.508064 |
| 4                | 6                | 0              | -0.886624               | -1.920393 | -2.312125 |
| 5                | 6                | 0              | 0.382867                | -2.239119 | -2.758657 |
| 6                | 6                | 0              | 1.198125                | -1.285087 | -2.142664 |
| 7                | 7                | 0              | -2.074094               | -0.521557 | 0.662933  |
| 8                | 6                | 0              | -3.126748               | -0.954243 | 1.384079  |
| 9                | 6                | 0              | -1.371927               | -0.802756 | 2.680452  |
| 10               | 6                | 0              | -2.724320               | -1.159288 | 2.691713  |
| 11               | 7                | 0              | -1.586295               | 1.456480  | -0.796783 |
| 12               | 6                | 0              | -2.254311               | 2.516464  | -1.295139 |
| 13               | 6                | 0              | -1.535567               | 3.669160  | -1.039228 |
| 14               | 6                | 0              | -0.405992               | 3.213855  | -0.352486 |
| 15               | 7                | 0              | -0.443548               | 1.898524  | -0.199128 |
| 16               | 7                | 0              | -0.986025               | -0.423592 | 1.471615  |
| 17               | 7                | 0              | 0.488497                | -0.458318 | -1.392174 |
| 18               | 29               | 0              | 0.792183                | 0.466185  | 0.576243  |
| 19               | 7                | 0              | 2.304466                | -0.665858 | 1.097053  |
| 20               | 16               | 0              | 2.991037                | 0.419231  | 2.109086  |
| 21               | 8                | 0              | 2.052809                | 1.576159  | 1.920435  |
| 22               | 8                | 0              | 3.269394                | -0.055086 | 3.459552  |
| 23               | 6                | 0              | 4.522733                | 0.897929  | 1.364101  |
| 24               | 6                | 0              | 4.505449                | 1.478730  | 0.095458  |
| 25               | 6                | 0              | 5.715836                | 0.687125  | 2.044726  |
| 26               | 6                | 0              | 5.705122                | 1.849017  | -0.488581 |
| 27               | 1                | 0              | 3.561501                | 1.634714  | -0.426450 |
| 28               | 6                | 0              | 6.909584                | 1.068010  | 1.443012  |
| 29               | 1                | 0              | 5.697528                | 0.240513  | 3.037082  |
| 30               | 6                | 0              | 6.922549                | 1.653471  | 0.175976  |
| 31               | 1                | 0              | 5.704586                | 2.302012  | -1.480229 |
| 32               | 1                | 0              | 7.851872                | 0.911439  | 1.967857  |
| 33               | 6                | 0              | 8.208211                | 2.089124  | -0.457837 |
| 34               | 1                | 0              | 8.233424                | 1.843458  | -1.526947 |
| 35               | 1                | 0              | 8.337827                | 3.177387  | -0.375833 |
| 36               | 1                | 0              | 9.074938                | 1.618745  | 0.020982  |
| 37               | 35               | 0              | -2.516088               | -2.836992 | -2.673222 |
| 38               | 35               | 0              | 0.895420                | -3.663872 | -3.908820 |
| 39               | 35               | 0              | 3.081489                | -1.087830 | -2.335085 |
| 40               | 35               | 0              | 1.045231                | 4.259671  | 0.286443  |
| 41               | 35               | 0              | -1.980489               | 5.454063  | -1.515479 |
| 42               | 35               | 0              | -3.938428               | 2.391886  | -2.170570 |
| 43               | 35               | 0              | -4.870894               | -1.193890 | 0.659168  |
| 44               | 35               | 0              | -3.768904               | -1.779487 | 4.152771  |
| 45               | 35               | 0              | -0.149125               | -0.809550 | 4.137380  |
| 46               | 6                | 0              | 3.927182                | -3.679362 | 0.476038  |
| 47               | 6                | 0              | 2.887330                | -4.287757 | -0.270327 |
| 48               | 6                | 0              | 1.555758                | -3.867180 | -0.072839 |
| 49               | 6                | 0              | 1.251460                | -2.841550 | 0.776044  |
| 50               | 6                | 0              | 2.298823                | -2.093726 | 1.538339  |
| 51               | 6                | 0              | 3.674141                | -2.668522 | 1.350707  |
| 52               | 1                | 0              | 4.947629                | -4.043138 | 0.358111  |
| 53               | 1                | 0              | 3.109679                | -5.086632 | -0.975114 |
| 54               | 1                | 0              | 0.751773                | -4.375514 | -0.606863 |
| 55               | 1                | 0              | 0.217467                | -2.526853 | 0.917232  |
| 56               | 1                | 0              | 2.042694                | -2.118133 | 2.617920  |
| 57               | 1                | 0              | 4.476691                | -2.224444 | 1.940325  |

Zero-point correction= 0.343056 (Hartree/Particle)  
 Thermal correction to Energy= 0.387965  
 Thermal correction to Enthalpy= 0.388909  
 Thermal correction to Gibbs Free Energy= 0.254530  
 Sum of electronic and zero-point Energies= -2116.507618  
 Sum of electronic and thermal Energies= -2116.462709  
 Sum of electronic and thermal Enthalpies= -2116.461765  
 Sum of electronic and thermal Free Energies= -2116.596144

#### 'TS4

| Center<br>Number | Atomic<br>Number | Atomic<br>Type | Coordinates (Angstroms) |           |           |
|------------------|------------------|----------------|-------------------------|-----------|-----------|
|                  |                  |                | X                       | Y         | Z         |
| 1                | 5                | 0              | 1.899651                | 0.304716  | 0.660058  |
| 2                | 1                | 0              | 2.936139                | 0.270909  | 1.244061  |
| 3                | 7                | 0              | 0.741353                | -0.109867 | 1.628305  |
| 4                | 6                | 0              | 0.769312                | -0.713543 | 2.832030  |
| 5                | 6                | 0              | -0.520886               | -0.804287 | 3.325403  |
| 6                | 6                | 0              | -1.299759               | -0.223460 | 2.322461  |
| 7                | 7                | 0              | 1.931127                | -0.659934 | -0.549383 |
| 8                | 6                | 0              | 2.795834                | -1.637301 | -0.893722 |
| 9                | 6                | 0              | 1.228621                | -1.473102 | -2.410442 |
| 10               | 6                | 0              | 2.386443                | -2.192579 | -2.090678 |
| 11               | 7                | 0              | 1.609450                | 1.747917  | 0.151920  |
| 12               | 6                | 0              | 2.356030                | 2.869438  | 0.255988  |
| 13               | 6                | 0              | 1.671558                | 3.929276  | -0.309223 |
| 14               | 6                | 0              | 0.477347                | 3.351680  | -0.750757 |
| 15               | 7                | 0              | 0.443480                | 2.059499  | -0.483148 |
| 16               | 7                | 0              | 0.955443                | -0.568886 | -1.489698 |
| 17               | 7                | 0              | -0.546365               | 0.184411  | 1.314614  |
| 18               | 29               | 0              | -0.905427               | 0.507284  | -0.725131 |
| 19               | 7                | 0              | -2.046877               | -1.037534 | -0.837577 |
| 20               | 16               | 0              | -3.034280               | -0.471693 | -1.979074 |
| 21               | 8                | 0              | -2.268040               | 0.829730  | -2.186472 |
| 22               | 8                | 0              | -3.301803               | -1.340334 | -3.116951 |
| 23               | 6                | 0              | -4.610241               | 0.035849  | -1.343044 |
| 24               | 6                | 0              | -4.724499               | 1.243021  | -0.656964 |
| 25               | 6                | 0              | -5.698357               | -0.821979 | -1.474083 |
| 26               | 6                | 0              | -5.950560               | 1.590979  | -0.108615 |
| 27               | 1                | 0              | -3.863518               | 1.905148  | -0.571670 |
| 28               | 6                | 0              | -6.914829               | -0.461061 | -0.909673 |
| 29               | 1                | 0              | -5.593868               | -1.748968 | -2.035111 |
| 30               | 6                | 0              | -7.060502               | 0.747873  | -0.225040 |
| 31               | 1                | 0              | -6.053878               | 2.539377  | 0.419001  |
| 32               | 1                | 0              | -7.773495               | -1.124971 | -1.009922 |
| 33               | 6                | 0              | -8.388049               | 1.150878  | 0.341069  |
| 34               | 1                | 0              | -8.273923               | 1.780400  | 1.231810  |
| 35               | 1                | 0              | -8.967576               | 1.729740  | -0.391850 |
| 36               | 1                | 0              | -8.992622               | 0.277775  | 0.614713  |
| 37               | 35               | 0              | 2.351197                | -1.383605 | 3.650657  |
| 38               | 35               | 0              | -1.094381               | -1.591656 | 4.959163  |
| 39               | 35               | 0              | -3.185193               | 0.052168  | 2.328707  |
| 40               | 35               | 0              | -0.992656               | 4.205148  | -1.609299 |
| 41               | 35               | 0              | 2.222475                | 5.742363  | -0.455732 |
| 42               | 35               | 0              | 4.085100                | 2.925621  | 1.049825  |
| 43               | 35               | 0              | 4.312504                | -2.134672 | 0.149183  |
| 44               | 35               | 0              | 3.179580                | -3.632919 | -3.049302 |
| 45               | 35               | 0              | 0.137027                | -1.662969 | -3.959374 |
| 46               | 1                | 0              | -2.088886               | -3.653945 | -2.326872 |
| 47               | 6                | 0              | -1.689595               | -3.621855 | -1.315113 |
| 48               | 6                | 0              | -2.525117               | -3.236598 | -0.250040 |
| 49               | 6                | 0              | -0.352568               | -3.914573 | -1.075089 |
| 50               | 6                | 0              | -2.019242               | -3.219203 | 1.062190  |
| 51               | 1                | 0              | -3.590092               | -3.075574 | -0.420481 |
| 52               | 6                | 0              | 0.155738                | -3.825985 | 0.216964  |
| 53               | 1                | 0              | 0.300188                | -4.197995 | -1.900235 |
| 54               | 6                | 0              | -0.683661               | -3.495707 | 1.289113  |
| 55               | 1                | 0              | -2.679177               | -2.965910 | 1.891143  |

|    |   |   |           |           |          |
|----|---|---|-----------|-----------|----------|
| 56 | 1 | 0 | 1.212817  | -4.029359 | 0.397941 |
| 57 | 1 | 0 | -0.284985 | -3.467111 | 2.302921 |

-----

|                                              |                             |
|----------------------------------------------|-----------------------------|
| Zero-point correction=                       | 0.342230 (Hartree/Particle) |
| Thermal correction to Energy=                | 0.386923                    |
| Thermal correction to Enthalpy=              | 0.387867                    |
| Thermal correction to Gibbs Free Energy=     | 0.255434                    |
| Sum of electronic and zero-point Energies=   | -2116.488623                |
| Sum of electronic and thermal Energies=      | -2116.443930                |
| Sum of electronic and thermal Enthalpies=    | -2116.442986                |
| Sum of electronic and thermal Free Energies= | -2116.575419                |

## 'INT5

-----

| Center<br>Number | Atomic<br>Number | Atomic<br>Type | Coordinates (Angstroms) |           |           |
|------------------|------------------|----------------|-------------------------|-----------|-----------|
|                  |                  |                | X                       | Y         | Z         |
| 1                | 5                | 0              | -1.803637               | 0.785724  | -0.048380 |
| 2                | 1                | 0              | -2.847327               | 1.347030  | 0.003053  |
| 3                | 7                | 0              | -0.863914               | 1.585486  | -0.991379 |
| 4                | 6                | 0              | -1.035406               | 2.825013  | -1.500855 |
| 5                | 6                | 0              | 0.178787                | 3.295253  | -1.963424 |
| 6                | 6                | 0              | 1.063174                | 2.251172  | -1.670640 |
| 7                | 7                | 0              | -2.038862               | -0.669353 | -0.529260 |
| 8                | 6                | 0              | -3.198638               | -1.277730 | -0.861477 |
| 9                | 6                | 0              | -1.653104               | -2.782461 | -0.524474 |
| 10               | 6                | 0              | -2.999393               | -2.644812 | -0.883848 |
| 11               | 7                | 0              | -1.161507               | 0.746254  | 1.365879  |
| 12               | 6                | 0              | -1.694655               | 1.138743  | 2.543392  |
| 13               | 6                | 0              | -0.772613               | 0.930276  | 3.548753  |
| 14               | 6                | 0              | 0.325746                | 0.384879  | 2.873502  |
| 15               | 7                | 0              | 0.100258                | 0.267862  | 1.576798  |
| 16               | 7                | 0              | -1.076926               | -1.610876 | -0.328819 |
| 17               | 7                | 0              | 0.444050                | 1.229523  | -1.107632 |
| 18               | 29               | 0              | 0.900384                | -0.674314 | -0.289547 |
| 19               | 7                | 0              | 2.246607                | -2.005013 | -1.150828 |
| 20               | 16               | 0              | 3.134472                | -2.768126 | 0.144764  |
| 21               | 8                | 0              | 2.228939                | -2.727780 | 1.277750  |
| 22               | 8                | 0              | 3.692378                | -4.028100 | -0.332974 |
| 23               | 6                | 0              | 4.455273                | -1.605496 | 0.349140  |
| 24               | 6                | 0              | 4.175911                | -0.288563 | 0.714902  |
| 25               | 6                | 0              | 5.762416                | -2.041673 | 0.157919  |
| 26               | 6                | 0              | 5.229567                | 0.595415  | 0.885579  |
| 27               | 1                | 0              | 3.149596                | 0.044563  | 0.876124  |
| 28               | 6                | 0              | 6.803968                | -1.140625 | 0.342274  |
| 29               | 1                | 0              | 5.953070                | -3.075070 | -0.124062 |
| 30               | 6                | 0              | 6.555594                | 0.183497  | 0.708837  |
| 31               | 1                | 0              | 5.019624                | 1.627411  | 1.167731  |
| 32               | 1                | 0              | 7.832416                | -1.471773 | 0.200377  |
| 33               | 6                | 0              | 7.680385                | 1.147361  | 0.930813  |
| 34               | 1                | 0              | 7.476766                | 2.117492  | 0.460100  |
| 35               | 1                | 0              | 7.827509                | 1.337491  | 2.002959  |
| 36               | 1                | 0              | 8.626716                | 0.765309  | 0.530965  |
| 37               | 35               | 0              | -2.709953               | 3.733260  | -1.542867 |
| 38               | 35               | 0              | 0.558386                | 4.966742  | -2.788757 |
| 39               | 35               | 0              | 2.960241                | 2.267880  | -1.898065 |
| 40               | 35               | 0              | 1.990890                | -0.119191 | 3.659181  |
| 41               | 35               | 0              | -0.950816               | 1.309862  | 5.404916  |
| 42               | 35               | 0              | -3.458633               | 1.841111  | 2.732031  |
| 43               | 35               | 0              | -4.820706               | -0.340935 | -1.217964 |
| 44               | 35               | 0              | -4.263240               | -4.010663 | -1.279411 |
| 45               | 35               | 0              | -0.709644               | -4.421124 | -0.242629 |
| 46               | 1                | 0              | 2.048866                | -3.984353 | -2.025011 |
| 47               | 6                | 0              | 1.830977                | -2.939281 | -2.246538 |
| 48               | 6                | 0              | 2.993305                | -2.019946 | -2.447643 |
| 49               | 6                | 0              | 0.592581                | -2.620194 | -2.966084 |
| 50               | 6                | 0              | 2.825670                | -0.878444 | -3.349245 |
| 51               | 1                | 0              | 3.989820                | -2.457907 | -2.362294 |

|    |   |   |           |           |           |
|----|---|---|-----------|-----------|-----------|
| 52 | 6 | 0 | 0.486032  | -1.482300 | -3.678512 |
| 53 | 1 | 0 | -0.212430 | -3.351893 | -2.950635 |
| 54 | 6 | 0 | 1.617431  | -0.598357 | -3.872603 |
| 55 | 1 | 0 | 3.703077  | -0.287322 | -3.601607 |
| 56 | 1 | 0 | -0.442956 | -1.256820 | -4.199984 |
| 57 | 1 | 0 | 1.495888  | 0.268832  | -4.520502 |

-----

Zero-point correction= 0.345360 (Hartree/Particle)  
Thermal correction to Energy= 0.390404  
Thermal correction to Enthalpy= 0.391348  
Thermal correction to Gibbs Free Energy= 0.256591  
Sum of electronic and zero-point Energies= -2116.543274  
Sum of electronic and thermal Energies= -2116.498230  
Sum of electronic and thermal Enthalpies= -2116.497286  
Sum of electronic and thermal Free Energies= -2116.632043

'TS5

-----

| Center<br>Number | Atomic<br>Number | Atomic<br>Type | Coordinates (Angstroms) |           |           |
|------------------|------------------|----------------|-------------------------|-----------|-----------|
|                  |                  |                | X                       | Y         | Z         |
| 1                | 5                | 0              | -2.064411               | -0.125147 | -0.708888 |
| 2                | 1                | 0              | -3.142311               | -0.280792 | -1.190378 |
| 3                | 7                | 0              | -1.025555               | -1.050806 | -1.414819 |
| 4                | 6                | 0              | -1.212386               | -2.258052 | -1.985044 |
| 5                | 6                | 0              | -0.015577               | -2.683695 | -2.535515 |
| 6                | 6                | 0              | 0.866572                | -1.641400 | -2.227796 |
| 7                | 7                | 0              | -2.097538               | -0.479071 | 0.798813  |
| 8                | 6                | 0              | -3.132589               | -0.525803 | 1.661480  |
| 9                | 6                | 0              | -1.257502               | -0.721097 | 2.760724  |
| 10               | 6                | 0              | -2.643587               | -0.691191 | 2.944317  |
| 11               | 7                | 0              | -1.626816               | 1.350273  | -0.873497 |
| 12               | 6                | 0              | -2.229121               | 2.363756  | -1.532185 |
| 13               | 6                | 0              | -1.445322               | 3.496640  | -1.436519 |
| 14               | 6                | 0              | -0.347005               | 3.075947  | -0.678452 |
| 15               | 7                | 0              | -0.458111               | 1.803495  | -0.335732 |
| 16               | 7                | 0              | -0.927820               | -0.596033 | 1.484722  |
| 17               | 7                | 0              | 0.272113                | -0.676669 | -1.552835 |
| 18               | 29               | 0              | 0.824141                | 0.438648  | 0.453844  |
| 19               | 7                | 0              | 2.459363                | -0.502982 | 1.109801  |
| 20               | 16               | 0              | 3.197139                | 0.551924  | 2.129534  |
| 21               | 8                | 0              | 2.327027                | 1.734356  | 2.121764  |
| 22               | 8                | 0              | 3.572845                | -0.087313 | 3.397068  |
| 23               | 6                | 0              | 4.715141                | 1.027807  | 1.323798  |
| 24               | 6                | 0              | 4.676754                | 1.420599  | -0.014175 |
| 25               | 6                | 0              | 5.910077                | 1.007266  | 2.031121  |
| 26               | 6                | 0              | 5.856476                | 1.789548  | -0.640365 |
| 27               | 1                | 0              | 3.730142                | 1.420226  | -0.555278 |
| 28               | 6                | 0              | 7.085128                | 1.383212  | 1.385909  |
| 29               | 1                | 0              | 5.910033                | 0.696399  | 3.074358  |
| 30               | 6                | 0              | 7.076061                | 1.779121  | 0.049094  |
| 31               | 1                | 0              | 5.839538                | 2.093265  | -1.687665 |
| 32               | 1                | 0              | 8.028505                | 1.370469  | 1.932364  |
| 33               | 6                | 0              | 8.338425                | 2.200011  | -0.641108 |
| 34               | 1                | 0              | 8.435863                | 1.727534  | -1.627345 |
| 35               | 1                | 0              | 8.357246                | 3.286328  | -0.805206 |
| 36               | 1                | 0              | 9.226375                | 1.940977  | -0.052286 |
| 37               | 35               | 0              | -2.883536               | -3.174752 | -1.961216 |
| 38               | 35               | 0              | 0.341669                | -4.316519 | -3.454701 |
| 39               | 35               | 0              | 2.710358                | -1.483134 | -2.711734 |
| 40               | 35               | 0              | 1.174476                | 4.103566  | -0.179152 |
| 41               | 35               | 0              | -1.790038               | 5.223438  | -2.155167 |
| 42               | 35               | 0              | -3.907921               | 2.209226  | -2.421333 |
| 43               | 35               | 0              | -4.954605               | -0.366509 | 1.127951  |
| 44               | 35               | 0              | -3.625894               | -0.848325 | 4.566023  |
| 45               | 35               | 0              | 0.088036                | -0.906393 | 4.104670  |
| 46               | 1                | 0              | 2.534910                | -2.018641 | 2.609829  |
| 47               | 6                | 0              | 2.626234                | -1.924358 | 1.503326  |

|    |   |   |          |           |           |
|----|---|---|----------|-----------|-----------|
| 48 | 6 | 0 | 3.990815 | -2.306245 | 1.098536  |
| 49 | 6 | 0 | 1.551981 | -2.738855 | 0.902360  |
| 50 | 6 | 0 | 4.235575 | -3.279547 | 0.161911  |
| 51 | 1 | 0 | 4.807608 | -1.742686 | 1.548413  |
| 52 | 6 | 0 | 1.817749 | -3.758673 | 0.041385  |
| 53 | 1 | 0 | 0.529072 | -2.466386 | 1.165903  |
| 54 | 6 | 0 | 3.153491 | -3.996240 | -0.358109 |
| 55 | 1 | 0 | 5.244375 | -3.488354 | -0.185458 |
| 56 | 1 | 0 | 1.015314 | -4.347941 | -0.397413 |
| 57 | 1 | 0 | 3.339217 | -4.763484 | -1.110357 |

-----  
Zero-point correction= 0.344235 (Hartree/Particle)  
Thermal correction to Energy= 0.388655  
Thermal correction to Enthalpy= 0.389599  
Thermal correction to Gibbs Free Energy= 0.257999  
Sum of electronic and zero-point Energies= -2116.510635  
Sum of electronic and thermal Energies= -2116.466215  
Sum of electronic and thermal Enthalpies= -2116.465271  
Sum of electronic and thermal Free Energies= -2116.596871

### !INT6

| Center<br>Number | Atomic<br>Number | Atomic<br>Type | Coordinates (Angstroms) |           |           |
|------------------|------------------|----------------|-------------------------|-----------|-----------|
|                  |                  |                | X                       | Y         | Z         |
| 1                | 5                | 0              | -1.908419               | -0.102936 | -1.049363 |
| 2                | 1                | 0              | -2.877790               | -0.252862 | -1.726727 |
| 3                | 7                | 0              | -0.681693               | -0.825970 | -1.681589 |
| 4                | 6                | 0              | -0.635994               | -2.035400 | -2.278975 |
| 5                | 6                | 0              | 0.680572                | -2.340171 | -2.575536 |
| 6                | 6                | 0              | 1.380962                | -1.228833 | -2.091288 |
| 7                | 7                | 0              | -2.144034               | -0.710816 | 0.362248  |
| 8                | 6                | 0              | -3.281516               | -0.998823 | 1.025889  |
| 9                | 6                | 0              | -1.575997               | -1.230842 | 2.365939  |
| 10               | 6                | 0              | -2.968574               | -1.348498 | 2.328296  |
| 11               | 7                | 0              | -1.606527               | 1.408408  | -0.884413 |
| 12               | 6                | 0              | -2.255765               | 2.477126  | -1.394942 |
| 13               | 6                | 0              | -1.687160               | 3.635278  | -0.901015 |
| 14               | 6                | 0              | -0.667345               | 3.171839  | -0.064180 |
| 15               | 7                | 0              | -0.622396               | 1.849422  | -0.047843 |
| 16               | 7                | 0              | -1.082355               | -0.852230 | 1.198965  |
| 17               | 7                | 0              | 0.576227                | -0.331299 | -1.556187 |
| 18               | 29               | 0              | 0.699897                | 0.545633  | 0.706057  |
| 19               | 7                | 0              | 2.335955                | -0.292702 | 1.356651  |
| 20               | 16               | 0              | 3.229644                | 0.627437  | 2.378904  |
| 21               | 8                | 0              | 2.387724                | 1.738692  | 2.799760  |
| 22               | 8                | 0              | 3.880386                | -0.235466 | 3.375367  |
| 23               | 6                | 0              | 4.521655                | 1.295037  | 1.346245  |
| 24               | 6                | 0              | 4.166549                | 1.994080  | 0.195343  |
| 25               | 6                | 0              | 5.858749                | 1.112095  | 1.686129  |
| 26               | 6                | 0              | 5.165663                | 2.497424  | -0.626261 |
| 27               | 1                | 0              | 3.114911                | 2.130857  | -0.058868 |
| 28               | 6                | 0              | 6.846207                | 1.627007  | 0.855024  |
| 29               | 1                | 0              | 6.110368                | 0.575336  | 2.599813  |
| 30               | 6                | 0              | 6.516127                | 2.322382  | -0.311341 |
| 31               | 1                | 0              | 4.894158                | 3.040363  | -1.531596 |
| 32               | 1                | 0              | 7.896645                | 1.492125  | 1.116263  |
| 33               | 6                | 0              | 7.595034                | 2.863897  | -1.200258 |
| 34               | 1                | 0              | 7.179716                | 3.443994  | -2.032371 |
| 35               | 1                | 0              | 8.279248                | 3.517664  | -0.643297 |
| 36               | 1                | 0              | 8.203946                | 2.055892  | -1.628450 |
| 37               | 35               | 0              | -2.178633               | -3.111666 | -2.589616 |
| 38               | 35               | 0              | 1.367747                | -3.906387 | -3.416327 |
| 39               | 35               | 0              | 3.275749                | -0.933569 | -2.126934 |
| 40               | 35               | 0              | 0.565176                | 4.203919  | 0.951076  |
| 41               | 35               | 0              | -2.189270               | 5.434130  | -1.259328 |
| 42               | 35               | 0              | -3.732551               | 2.358088  | -2.592773 |
| 43               | 35               | 0              | -5.008553               | -0.928178 | 0.225688  |

|    |    |   |           |           |          |
|----|----|---|-----------|-----------|----------|
| 44 | 35 | 0 | -4.152722 | -1.877488 | 3.720278 |
| 45 | 35 | 0 | -0.411855 | -1.556080 | 3.848619 |
| 46 | 1  | 0 | 2.611548  | -2.111563 | 2.341809 |
| 47 | 6  | 0 | 2.674533  | -1.655265 | 1.274578 |
| 48 | 6  | 0 | 4.056186  | -2.139194 | 1.124657 |
| 49 | 6  | 0 | 1.644057  | -2.564135 | 0.778601 |
| 50 | 6  | 0 | 4.317243  | -3.433190 | 0.738586 |
| 51 | 1  | 0 | 4.861490  | -1.480886 | 1.441117 |
| 52 | 6  | 0 | 1.943353  | -3.846261 | 0.375478 |
| 53 | 1  | 0 | 0.615087  | -2.202084 | 0.823372 |
| 54 | 6  | 0 | 3.271678  | -4.276095 | 0.343998 |
| 55 | 1  | 0 | 5.344654  | -3.787572 | 0.700905 |
| 56 | 1  | 0 | 1.142946  | -4.512009 | 0.059230 |
| 57 | 1  | 0 | 3.497309  | -5.290121 | 0.017945 |

-----

Zero-point correction= 0.341642 (Hartree/Particle)  
Thermal correction to Energy= 0.387187  
Thermal correction to Enthalpy= 0.388131  
Thermal correction to Gibbs Free Energy= 0.251883  
Sum of electronic and zero-point Energies= -2116.522340  
Sum of electronic and thermal Energies= -2116.476795  
Sum of electronic and thermal Enthalpies= -2116.475850  
Sum of electronic and thermal Free Energies= -2116.612099

**'TS6**

-----

| Center Number | Atomic Number | Atomic Type | Coordinates (Angstroms) |           |           |
|---------------|---------------|-------------|-------------------------|-----------|-----------|
|               |               |             | X                       | Y         | Z         |
| 1             | 5             | 0           | -1.743311               | -0.022815 | -1.113891 |
| 2             | 1             | 0           | -2.635454               | -0.139940 | -1.895352 |
| 3             | 7             | 0           | -0.435106               | -0.640287 | -1.681569 |
| 4             | 6             | 0           | -0.296939               | -1.767602 | -2.409982 |
| 5             | 6             | 0           | 1.048182                | -1.997395 | -2.630536 |
| 6             | 6             | 0           | 1.667222                | -0.935003 | -1.962587 |
| 7             | 7             | 0           | -2.100560               | -0.778160 | 0.197087  |
| 8             | 6             | 0           | -3.276521               | -1.233296 | 0.669901  |
| 9             | 6             | 0           | -1.707495               | -1.604323 | 2.137669  |
| 10            | 6             | 0           | -3.076979               | -1.785444 | 1.924343  |
| 11            | 7             | 0           | -1.522754               | 1.471479  | -0.774907 |
| 12            | 6             | 0           | -2.149274               | 2.563016  | -1.262996 |
| 13            | 6             | 0           | -1.715941               | 3.680917  | -0.577113 |
| 14            | 6             | 0           | -0.798843               | 3.168366  | 0.344477  |
| 15            | 7             | 0           | -0.681903               | 1.853536  | 0.230830  |
| 16            | 7             | 0           | -1.124925               | -1.004322 | 1.113545  |
| 17            | 7             | 0           | 0.791095                | -0.129643 | -1.387451 |
| 18            | 29            | 0           | 0.582072                | 0.465509  | 0.981160  |
| 19            | 7             | 0           | 2.187841                | -0.360697 | 1.764663  |
| 20            | 16            | 0           | 3.144064                | 0.683872  | 2.662109  |
| 21            | 8             | 0           | 2.230485                | 1.714235  | 3.125547  |
| 22            | 8             | 0           | 3.960691                | -0.071203 | 3.611418  |
| 23            | 6             | 0           | 4.205047                | 1.391081  | 1.430157  |
| 24            | 6             | 0           | 3.651183                | 2.282930  | 0.510497  |
| 25            | 6             | 0           | 5.547710                | 1.038753  | 1.371135  |
| 26            | 6             | 0           | 4.457073                | 2.804777  | -0.486735 |
| 27            | 1             | 0           | 2.600059                | 2.561625  | 0.583637  |
| 28            | 6             | 0           | 6.340997                | 1.572248  | 0.360019  |
| 29            | 1             | 0           | 5.967512                | 0.378226  | 2.127617  |
| 30            | 6             | 0           | 5.808733                | 2.451602  | -0.583398 |
| 31            | 1             | 0           | 4.033444                | 3.498497  | -1.213016 |
| 32            | 1             | 0           | 7.397062                | 1.307624  | 0.307776  |
| 33            | 6             | 0           | 6.653348                | 3.005550  | -1.689658 |
| 34            | 1             | 0           | 6.574076                | 4.099043  | -1.744688 |
| 35            | 1             | 0           | 7.711041                | 2.748543  | -1.560672 |
| 36            | 1             | 0           | 6.329949                | 2.613423  | -2.663935 |
| 37            | 35            | 0           | -1.768877               | -2.851048 | -2.953372 |
| 38            | 35            | 0           | 1.855599                | -3.441053 | -3.574852 |
| 39            | 35            | 0           | 3.549141                | -0.608483 | -1.823204 |

|    |    |   |           |           |           |
|----|----|---|-----------|-----------|-----------|
| 40 | 35 | 0 | 0.196497  | 4.150456  | 1.633176  |
| 41 | 35 | 0 | -2.251136 | 5.488857  | -0.822927 |
| 42 | 35 | 0 | -3.417579 | 2.521884  | -2.682555 |
| 43 | 35 | 0 | -4.917544 | -1.076779 | -0.284256 |
| 44 | 35 | 0 | -4.358841 | -2.606311 | 3.064422  |
| 45 | 35 | 0 | -0.679642 | -2.122433 | 3.668312  |
| 46 | 1  | 0 | 2.123188  | -1.690741 | 2.509799  |
| 47 | 6  | 0 | 2.668383  | -1.720107 | 1.452166  |
| 48 | 6  | 0 | 4.011279  | -2.194832 | 1.626722  |
| 49 | 6  | 0 | 1.764385  | -2.542734 | 0.701644  |
| 50 | 6  | 0 | 4.372589  | -3.432386 | 1.135627  |
| 51 | 1  | 0 | 4.711753  | -1.605138 | 2.207442  |
| 52 | 6  | 0 | 2.156735  | -3.777846 | 0.230754  |
| 53 | 1  | 0 | 0.746737  | -2.183466 | 0.557299  |
| 54 | 6  | 0 | 3.464771  | -4.219483 | 0.424102  |
| 55 | 1  | 0 | 5.387140  | -3.789752 | 1.298815  |
| 56 | 1  | 0 | 1.443067  | -4.388549 | -0.318929 |
| 57 | 1  | 0 | 3.776146  | -5.185463 | 0.031877  |

-----

Zero-point correction= 0.340389 (Hartree/Particle)  
Thermal correction to Energy= 0.385404  
Thermal correction to Enthalpy= 0.386348  
Thermal correction to Gibbs Free Energy= 0.253210  
Sum of electronic and zero-point Energies= -2116.507298  
Sum of electronic and thermal Energies= -2116.462283  
Sum of electronic and thermal Enthalpies= -2116.461339  
Sum of electronic and thermal Free Energies= -2116.594477

#### INT7

-----

| Center<br>Number | Atomic<br>Number | Atomic<br>Type | Coordinates (Angstroms) |           |           |
|------------------|------------------|----------------|-------------------------|-----------|-----------|
|                  |                  |                | X                       | Y         | Z         |
| 1                | 5                | 0              | -2.181473               | 0.047620  | 0.473958  |
| 2                | 1                | 0              | -3.303637               | 0.118392  | 0.852775  |
| 3                | 7                | 0              | -1.279638               | -0.407446 | 1.649487  |
| 4                | 6                | 0              | -1.632005               | -0.668447 | 2.926805  |
| 5                | 6                | 0              | -0.516782               | -1.084574 | 3.626044  |
| 6                | 6                | 0              | 0.498661                | -1.046397 | 2.665174  |
| 7                | 7                | 0              | -1.722841               | 1.437867  | -0.037928 |
| 8                | 6                | 0              | -2.427908               | 2.582946  | -0.156559 |
| 9                | 6                | 0              | -0.420639               | 2.874715  | -0.955101 |
| 10               | 6                | 0              | -1.628356               | 3.545620  | -0.742564 |
| 11               | 7                | 0              | -2.106795               | -0.980172 | -0.682425 |
| 12               | 6                | 0              | -3.087756               | -1.686442 | -1.283378 |
| 13               | 6                | 0              | -2.539748               | -2.446731 | -2.299836 |
| 14               | 6                | 0              | -1.178299               | -2.133040 | -2.247548 |
| 15               | 7                | 0              | -0.921614               | -1.261379 | -1.286984 |
| 16               | 7                | 0              | -0.468424               | 1.623103  | -0.534266 |
| 17               | 7                | 0              | 0.053802                | -0.640280 | 1.486963  |
| 18               | 29               | 0              | 0.730052                | -0.243802 | -0.602434 |
| 19               | 7                | 0              | 2.660428                | 0.148892  | -1.273019 |
| 20               | 16               | 0              | 3.478888                | -1.437790 | -1.381406 |
| 21               | 8                | 0              | 2.824732                | -2.277023 | -0.396979 |
| 22               | 8                | 0              | 3.457903                | -1.736561 | -2.804948 |
| 23               | 6                | 0              | 5.137408                | -1.131436 | -0.866168 |
| 24               | 6                | 0              | 5.417856                | -1.054095 | 0.496403  |
| 25               | 6                | 0              | 6.117549                | -0.908646 | -1.827552 |
| 26               | 6                | 0              | 6.704318                | -0.727141 | 0.893193  |
| 27               | 1                | 0              | 4.633370                | -1.249845 | 1.225872  |
| 28               | 6                | 0              | 7.404276                | -0.597159 | -1.407666 |
| 29               | 1                | 0              | 5.868699                | -0.992299 | -2.883990 |
| 30               | 6                | 0              | 7.711640                | -0.488706 | -0.049035 |
| 31               | 1                | 0              | 6.939737                | -0.659680 | 1.955113  |
| 32               | 1                | 0              | 8.187999                | -0.435134 | -2.147300 |
| 33               | 6                | 0              | 9.090116                | -0.111837 | 0.399160  |
| 34               | 1                | 0              | 9.831371                | -0.265611 | -0.393473 |
| 35               | 1                | 0              | 9.130827                | 0.947857  | 0.687586  |

|    |    |   |           |           |           |
|----|----|---|-----------|-----------|-----------|
| 36 | 1  | 0 | 9.400759  | -0.694202 | 1.275393  |
| 37 | 35 | 0 | -3.399914 | -0.465632 | 3.612208  |
| 38 | 35 | 0 | -0.392652 | -1.587457 | 5.456375  |
| 39 | 35 | 0 | 2.325575  | -1.525236 | 2.967269  |
| 40 | 35 | 0 | 0.224410  | -2.784579 | -3.354365 |
| 41 | 35 | 0 | -3.430688 | -3.632385 | -3.490385 |
| 42 | 35 | 0 | -4.923225 | -1.594914 | -0.777713 |
| 43 | 35 | 0 | -4.236295 | 2.788159  | 0.409972  |
| 44 | 35 | 0 | -2.078652 | 5.343397  | -1.173750 |
| 45 | 35 | 0 | 1.152392  | 3.597983  | -1.768916 |
| 46 | 1  | 0 | 2.573824  | 0.428615  | -2.256104 |
| 47 | 6  | 0 | 3.349858  | 1.184173  | -0.534139 |
| 48 | 6  | 0 | 4.354779  | 1.926624  | -1.152686 |
| 49 | 6  | 0 | 3.003877  | 1.432560  | 0.788583  |
| 50 | 6  | 0 | 5.015198  | 2.919745  | -0.442406 |
| 51 | 1  | 0 | 4.614729  | 1.722807  | -2.192655 |
| 52 | 6  | 0 | 3.678048  | 2.419262  | 1.500629  |
| 53 | 1  | 0 | 2.194304  | 0.865573  | 1.246754  |
| 54 | 6  | 0 | 4.682120  | 3.161951  | 0.888630  |
| 55 | 1  | 0 | 5.793549  | 3.504726  | -0.928618 |
| 56 | 1  | 0 | 3.404551  | 2.614257  | 2.535685  |
| 57 | 1  | 0 | 5.199551  | 3.941475  | 1.444663  |

-----

Zero-point correction= 0.345571 (Hartree/Particle)  
Thermal correction to Energy= 0.390909  
Thermal correction to Enthalpy= 0.391853  
Thermal correction to Gibbs Free Energy= 0.256285  
Sum of electronic and zero-point Energies= -2116.598999  
Sum of electronic and thermal Energies= -2116.553661  
Sum of electronic and thermal Enthalpies= -2116.552717  
Sum of electronic and thermal Free Energies= -2116.688285

### <sup>3</sup>TS7

-----

| Center<br>Number | Atomic<br>Number | Atomic<br>Type | Coordinates (Angstroms) |           |           |
|------------------|------------------|----------------|-------------------------|-----------|-----------|
|                  |                  |                | X                       | Y         | Z         |
| 1                | 5                | 0              | -1.779701               | 0.358172  | -0.656593 |
| 2                | 1                | 0              | -2.871924               | 0.434515  | -1.115671 |
| 3                | 7                | 0              | -1.067369               | -0.897149 | -1.221413 |
| 4                | 6                | 0              | -1.518449               | -1.830200 | -2.083159 |
| 5                | 6                | 0              | -0.475119               | -2.663995 | -2.435053 |
| 6                | 6                | 0              | 0.613076                | -2.161043 | -1.714456 |
| 7                | 7                | 0              | -1.864959               | 0.293735  | 0.883946  |
| 8                | 6                | 0              | -2.939580               | 0.357875  | 1.696987  |
| 9                | 6                | 0              | -1.110397               | 0.407380  | 2.892998  |
| 10               | 6                | 0              | -2.506355               | 0.427740  | 3.007835  |
| 11               | 7                | 0              | -0.947230               | 1.614992  | -1.048668 |
| 12               | 6                | 0              | -1.317574               | 2.735938  | -1.700806 |
| 13               | 6                | 0              | -0.228352               | 3.580823  | -1.810080 |
| 14               | 6                | 0              | 0.799179                | 2.879101  | -1.174019 |
| 15               | 7                | 0              | 0.368755                | 1.714173  | -0.715338 |
| 16               | 7                | 0              | -0.728979               | 0.317090  | 1.630080  |
| 17               | 7                | 0              | 0.255213                | -1.113729 | -0.987486 |
| 18               | 29               | 0              | 1.175478                | 0.165357  | 0.402215  |
| 19               | 7                | 0              | 2.439782                | -1.183730 | 1.106021  |
| 20               | 16               | 0              | 3.263967                | -0.099582 | 2.013901  |
| 21               | 8                | 0              | 2.532576                | 1.177802  | 1.671682  |
| 22               | 8                | 0              | 3.441032                | -0.430814 | 3.421642  |
| 23               | 6                | 0              | 4.859247                | -0.003269 | 1.254644  |
| 24               | 6                | 0              | 4.965482                | 0.369018  | -0.084828 |
| 25               | 6                | 0              | 5.984645                | -0.322519 | 2.007552  |
| 26               | 6                | 0              | 6.222690                | 0.424363  | -0.666759 |
| 27               | 1                | 0              | 4.077803                | 0.621415  | -0.664566 |
| 28               | 6                | 0              | 7.234691                | -0.255621 | 1.407758  |
| 29               | 1                | 0              | 5.868115                | -0.604851 | 3.051843  |
| 30               | 6                | 0              | 7.372222                | 0.111789  | 0.066468  |
| 31               | 1                | 0              | 6.319320                | 0.718545  | -1.711716 |



|    |    |   |           |           |           |
|----|----|---|-----------|-----------|-----------|
| 32 | 1  | 0 | 8.124882  | -0.493455 | 1.990335  |
| 33 | 6  | 0 | 8.725383  | 0.148193  | -0.575463 |
| 34 | 1  | 0 | 9.040696  | -0.857934 | -0.885899 |
| 35 | 1  | 0 | 8.732804  | 0.782520  | -1.469621 |
| 36 | 1  | 0 | 9.488363  | 0.524758  | 0.117041  |
| 37 | 35 | 0 | -3.334946 | -1.972113 | -2.636936 |
| 38 | 35 | 0 | -0.519569 | -4.159387 | -3.609044 |
| 39 | 35 | 0 | 2.405190  | -2.799119 | -1.780669 |
| 40 | 35 | 0 | 2.611665  | 3.422221  | -0.975872 |
| 41 | 35 | 0 | -0.152782 | 5.292360  | -2.632014 |
| 42 | 35 | 0 | -3.083562 | 3.055778  | -2.333461 |
| 43 | 35 | 0 | -4.739407 | 0.344088  | 1.066999  |
| 44 | 35 | 0 | -3.556607 | 0.534192  | 4.588941  |
| 45 | 35 | 0 | 0.164846  | 0.488331  | 4.303413  |
| 46 | 1  | 0 | 1.711756  | -2.016338 | 1.967296  |
| 47 | 6  | 0 | 1.123377  | -2.868975 | 2.671048  |
| 48 | 1  | 0 | 0.765557  | -2.288278 | 3.528022  |
| 49 | 1  | 0 | 1.962804  | -3.521514 | 2.935649  |
| 50 | 6  | 0 | 0.100333  | -3.469457 | 1.824437  |
| 51 | 6  | 0 | -1.204162 | -2.946232 | 1.790071  |
| 52 | 6  | 0 | 0.414885  | -4.534979 | 0.962311  |
| 53 | 6  | 0 | -2.153560 | -3.456701 | 0.918065  |
| 54 | 1  | 0 | -1.462186 | -2.132582 | 2.468518  |
| 55 | 6  | 0 | -0.538247 | -5.056052 | 0.100701  |
| 56 | 1  | 0 | 1.426516  | -4.942010 | 0.975571  |
| 57 | 6  | 0 | -1.822391 | -4.510245 | 0.065489  |
| 58 | 1  | 0 | -2.563072 | -4.900839 | -0.631954 |
| 59 | 1  | 0 | -3.156106 | -3.028222 | 0.897326  |
| 60 | 1  | 0 | -0.279613 | -5.882007 | -0.560334 |

-----  
Zero-point correction= 0.365222 (Hartree/Particle)  
Thermal correction to Energy= 0.411483  
Thermal correction to Enthalpy= 0.412427  
Thermal correction to Gibbs Free Energy= 0.276071  
Sum of electronic and zero-point Energies= -2155.750252  
Sum of electronic and thermal Energies= -2155.703991  
Sum of electronic and thermal Enthalpies= -2155.703047  
Sum of electronic and thermal Free Energies= -2155.839404

### <sup>3</sup>INT8

| Center<br>Number | Atomic<br>Number | Atomic<br>Type | Coordinates (Angstroms) |           |           |
|------------------|------------------|----------------|-------------------------|-----------|-----------|
|                  |                  |                | X                       | Y         | Z         |
| 1                | 5                | 0              | 1.785578                | 0.819848  | 0.237646  |
| 2                | 1                | 0              | 2.856165                | 1.203232  | 0.577180  |
| 3                | 7                | 0              | 1.002623                | 0.287301  | 1.468389  |
| 4                | 6                | 0              | 1.365838                | 0.203812  | 2.762379  |
| 5                | 6                | 0              | 0.275651                | -0.193426 | 3.512648  |
| 6                | 6                | 0              | -0.745311               | -0.337699 | 2.567786  |
| 7                | 7                | 0              | 1.930417                | -0.291726 | -0.819214 |
| 8                | 6                | 0              | 3.025057                | -0.934901 | -1.274132 |
| 9                | 6                | 0              | 1.252679                | -1.684883 | -2.309520 |
| 10               | 6                | 0              | 2.641021                | -1.843725 | -2.240583 |
| 11               | 7                | 0              | 0.965088                | 1.999325  | -0.363527 |
| 12               | 6                | 0              | 1.301093                | 3.296416  | -0.513071 |
| 13               | 6                | 0              | 0.216334                | 3.994172  | -1.012402 |
| 14               | 6                | 0              | -0.777518               | 3.019883  | -1.139070 |
| 15               | 7                | 0              | -0.328427               | 1.832661  | -0.756695 |
| 16               | 7                | 0              | 0.829815                | -0.766536 | -1.459094 |
| 17               | 7                | 0              | -0.307131               | -0.055724 | 1.351127  |
| 18               | 29               | 0              | -1.112260               | -0.049876 | -0.614077 |
| 19               | 7                | 0              | -2.198007               | -1.677885 | -0.422054 |
| 20               | 16               | 0              | -3.175797               | -1.330190 | -1.668293 |
| 21               | 8                | 0              | -2.593567               | -0.003594 | -2.102632 |
| 22               | 8                | 0              | -3.354396               | -2.376912 | -2.664991 |
| 23               | 6                | 0              | -4.753433               | -0.949517 | -0.965355 |
| 24               | 6                | 0              | -4.874547               | 0.139014  | -0.104332 |

|    |    |   |           |           |           |
|----|----|---|-----------|-----------|-----------|
| 25 | 6  | 0 | -5.846706 | -1.752546 | -1.270344 |
| 26 | 6  | 0 | -6.109990 | 0.413385  | 0.462369  |
| 27 | 1  | 0 | -4.012201 | 0.768224  | 0.114979  |
| 28 | 6  | 0 | -7.077488 | -1.457537 | -0.698955 |
| 29 | 1  | 0 | -5.726550 | -2.585845 | -1.959293 |
| 30 | 6  | 0 | -7.226205 | -0.379681 | 0.177111  |
| 31 | 1  | 0 | -6.216749 | 1.263642  | 1.135763  |
| 32 | 1  | 0 | -7.944268 | -2.073502 | -0.939252 |
| 33 | 6  | 0 | -8.553833 | -0.091670 | 0.809597  |
| 34 | 1  | 0 | -8.734798 | -0.755541 | 1.666558  |
| 35 | 1  | 0 | -8.611719 | 0.939596  | 1.177139  |
| 36 | 1  | 0 | -9.377888 | -0.248414 | 0.102506  |
| 37 | 35 | 0 | 3.131249  | 0.554915  | 3.382613  |
| 38 | 35 | 0 | 0.208934  | -0.538988 | 5.381481  |
| 39 | 35 | 0 | -2.556846 | -0.816357 | 2.906484  |
| 40 | 35 | 0 | -2.566699 | 3.279481  | -1.725296 |
| 41 | 35 | 0 | 0.098533  | 5.845758  | -1.421435 |
| 42 | 35 | 0 | 3.013098  | 4.000870  | -0.073761 |
| 43 | 35 | 0 | 4.786760  | -0.621534 | -0.620347 |
| 44 | 35 | 0 | 3.731104  | -3.081857 | -3.186271 |
| 45 | 35 | 0 | 0.033129  | -2.595292 | -3.451503 |
| 46 | 1  | 0 | -1.693842 | -2.557664 | -0.604824 |
| 47 | 6  | 0 | -0.957736 | -4.739261 | -0.525484 |
| 48 | 1  | 0 | -0.628359 | -5.009521 | -1.526544 |
| 49 | 1  | 0 | -1.993317 | -4.950552 | -0.260410 |
| 50 | 6  | 0 | -0.066715 | -4.198564 | 0.413739  |
| 51 | 6  | 0 | 1.292052  | -3.939203 | 0.082327  |
| 52 | 6  | 0 | -0.493367 | -3.879710 | 1.733198  |
| 53 | 6  | 0 | 2.164414  | -3.407246 | 1.014175  |
| 54 | 1  | 0 | 1.641894  | -4.182809 | -0.922410 |
| 55 | 6  | 0 | 0.390387  | -3.362168 | 2.659675  |
| 56 | 1  | 0 | -1.535431 | -4.056875 | 2.002605  |
| 57 | 6  | 0 | 1.724907  | -3.120453 | 2.311590  |
| 58 | 1  | 0 | 2.415370  | -2.711308 | 3.049311  |
| 59 | 1  | 0 | 3.204973  | -3.231406 | 0.738557  |
| 60 | 1  | 0 | 0.046435  | -3.140746 | 3.670493  |

-----

Zero-point correction= 0.369216 (Hartree/Particle)  
Thermal correction to Energy= 0.416246  
Thermal correction to Enthalpy= 0.417190  
Thermal correction to Gibbs Free Energy= 0.278630  
Sum of electronic and zero-point Energies= -2155.777813  
Sum of electronic and thermal Energies= -2155.730783  
Sum of electronic and thermal Enthalpies= -2155.729839  
Sum of electronic and thermal Free Energies= -2155.868399

#### 'INT10

-----

| Center<br>Number | Atomic<br>Number | Atomic<br>Type | Coordinates (Angstroms) |           |           |
|------------------|------------------|----------------|-------------------------|-----------|-----------|
|                  |                  |                | X                       | Y         | Z         |
| 1                | 5                | 0              | 1.317416                | 1.198421  | 0.547378  |
| 2                | 1                | 0              | 2.147976                | 1.876028  | 1.061726  |
| 3                | 7                | 0              | 0.393938                | 0.597914  | 1.647454  |
| 4                | 6                | 0              | 0.488989                | 0.663669  | 2.991745  |
| 5                | 6                | 0              | -0.632338               | 0.078717  | 3.552371  |
| 6                | 6                | 0              | -1.376478               | -0.320991 | 2.439216  |
| 7                | 7                | 0              | 2.014518                | 0.075060  | -0.269234 |
| 8                | 6                | 0              | 3.299520                | -0.340747 | -0.267652 |
| 9                | 6                | 0              | 2.209396                | -1.352735 | -1.858523 |
| 10               | 6                | 0              | 3.480242                | -1.259158 | -1.284870 |
| 11               | 7                | 0              | 0.447606                | 2.072925  | -0.399190 |
| 12               | 6                | 0              | 0.546177                | 3.396591  | -0.655449 |
| 13               | 6                | 0              | -0.410803               | 3.752995  | -1.585319 |
| 14               | 6                | 0              | -1.071506               | 2.549798  | -1.849908 |
| 15               | 7                | 0              | -0.573288               | 1.551298  | -1.142610 |
| 16               | 7                | 0              | 1.337285                | -0.572979 | -1.251011 |
| 17               | 7                | 0              | -0.765211               | -0.024491 | 1.305129  |

|    |    |   |           |           |           |
|----|----|---|-----------|-----------|-----------|
| 18 | 29 | 0 | -0.868856 | -0.492915 | -0.855278 |
| 19 | 7  | 0 | -1.372514 | -2.436827 | -1.328443 |
| 20 | 16 | 0 | -2.834895 | -2.561872 | -2.276086 |
| 21 | 8  | 0 | -2.590283 | -1.669077 | -3.394320 |
| 22 | 8  | 0 | -3.127272 | -3.973735 | -2.478632 |
| 23 | 6  | 0 | -4.051259 | -1.884160 | -1.188711 |
| 24 | 6  | 0 | -4.190752 | -0.500250 | -1.101271 |
| 25 | 6  | 0 | -4.878023 | -2.745926 | -0.475883 |
| 26 | 6  | 0 | -5.166711 | 0.021349  | -0.267455 |
| 27 | 1  | 0 | -3.556983 | 0.157040  | -1.695899 |
| 28 | 6  | 0 | -5.847836 | -2.202255 | 0.357826  |
| 29 | 1  | 0 | -4.767248 | -3.822629 | -0.589376 |
| 30 | 6  | 0 | -5.998568 | -0.818058 | 0.481527  |
| 31 | 1  | 0 | -5.283916 | 1.102331  | -0.189821 |
| 32 | 1  | 0 | -6.503755 | -2.863269 | 0.924103  |
| 33 | 6  | 0 | -7.000432 | -0.239675 | 1.431743  |
| 34 | 1  | 0 | -6.514408 | 0.027285  | 2.381655  |
| 35 | 1  | 0 | -7.454163 | 0.676401  | 1.034602  |
| 36 | 1  | 0 | -7.802642 | -0.950726 | 1.660703  |
| 37 | 35 | 0 | 1.954548  | 1.446408  | 3.923834  |
| 38 | 35 | 0 | -1.063472 | -0.111567 | 5.395194  |
| 39 | 35 | 0 | -3.053050 | -1.237224 | 2.444955  |
| 40 | 35 | 0 | -2.495952 | 2.277456  | -3.088360 |
| 41 | 35 | 0 | -0.755541 | 5.472595  | -2.319396 |
| 42 | 35 | 0 | 1.807276  | 4.555756  | 0.179807  |
| 43 | 35 | 0 | 4.594815  | 0.219807  | 1.011795  |
| 44 | 35 | 0 | 5.067069  | -2.200099 | -1.749516 |
| 45 | 35 | 0 | 1.678161  | -2.410675 | -3.365909 |
| 46 | 1  | 0 | -0.636273 | -2.625904 | -2.027660 |
| 47 | 6  | 0 | -1.272139 | -3.456239 | -0.233838 |
| 48 | 1  | 0 | -1.666296 | -4.412091 | -0.608431 |
| 49 | 1  | 0 | -1.912843 | -3.109378 | 0.586475  |
| 50 | 6  | 0 | 0.152299  | -3.611129 | 0.215931  |
| 51 | 6  | 0 | 1.031997  | -4.402101 | -0.526745 |
| 52 | 6  | 0 | 0.629020  | -2.957897 | 1.352667  |
| 53 | 6  | 0 | 2.369955  | -4.504547 | -0.163085 |
| 54 | 1  | 0 | 0.664056  | -4.934379 | -1.406127 |
| 55 | 6  | 0 | 1.967473  | -3.054771 | 1.718444  |
| 56 | 1  | 0 | -0.056293 | -2.369161 | 1.959814  |
| 57 | 6  | 0 | 2.842028  | -3.823697 | 0.956422  |
| 58 | 1  | 0 | 3.893953  | -3.888893 | 1.231736  |
| 59 | 1  | 0 | 3.048550  | -5.109439 | -0.762628 |
| 60 | 1  | 0 | 2.326060  | -2.527333 | 2.602395  |

-----

Zero-point correction= 0.376197 (Hartree/Particle)  
Thermal correction to Energy= 0.422133  
Thermal correction to Enthalpy= 0.423077  
Thermal correction to Gibbs Free Energy= 0.287919  
Sum of electronic and zero-point Energies= -2155.861016  
Sum of electronic and thermal Energies= -2155.815080  
Sum of electronic and thermal Enthalpies= -2155.814136  
Sum of electronic and thermal Free Energies= -2155.949293

### <sup>3</sup>TS8

-----

| Center<br>Number | Atomic<br>Number | Atomic<br>Type | Coordinates (Angstroms) |           |           |
|------------------|------------------|----------------|-------------------------|-----------|-----------|
|                  |                  |                | X                       | Y         | Z         |
| 1                | 5                | 0              | -2.022637               | -0.126575 | -0.685016 |
| 2                | 1                | 0              | -3.077137               | -0.359582 | -1.180718 |
| 3                | 7                | 0              | -0.906436               | -0.952892 | -1.381517 |
| 4                | 6                | 0              | -0.999750               | -2.049835 | -2.158809 |
| 5                | 6                | 0              | 0.257940                | -2.372458 | -2.634124 |
| 6                | 6                | 0              | 1.085504                | -1.396456 | -2.068763 |
| 7                | 7                | 0              | -2.069658               | -0.480475 | 0.820698  |
| 8                | 6                | 0              | -3.115024               | -0.813048 | 1.604721  |
| 9                | 6                | 0              | -1.319480               | -0.606846 | 2.833362  |
| 10               | 6                | 0              | -2.682159               | -0.913315 | 2.913513  |

|    |    |   |           |           |           |
|----|----|---|-----------|-----------|-----------|
| 11 | 7  | 0 | -1.684631 | 1.382932  | -0.828965 |
| 12 | 6  | 0 | -2.343842 | 2.367766  | -1.473176 |
| 13 | 6  | 0 | -1.639656 | 3.549871  | -1.338590 |
| 14 | 6  | 0 | -0.525914 | 3.187170  | -0.575644 |
| 15 | 7  | 0 | -0.557460 | 1.900499  | -0.266916 |
| 16 | 7  | 0 | -0.952082 | -0.351789 | 1.586987  |
| 17 | 7  | 0 | 0.394055  | -0.557190 | -1.317421 |
| 18 | 29 | 0 | 0.773405  | 0.559598  | 0.559974  |
| 19 | 7  | 0 | 2.433312  | -0.385412 | 0.978841  |
| 20 | 16 | 0 | 2.986013  | 0.711774  | 2.071806  |
| 21 | 8  | 0 | 1.924326  | 1.771452  | 1.989933  |
| 22 | 8  | 0 | 3.343228  | 0.208487  | 3.396322  |
| 23 | 6  | 0 | 4.453449  | 1.348791  | 1.314840  |
| 24 | 6  | 0 | 4.369579  | 1.954434  | 0.059980  |
| 25 | 6  | 0 | 5.672945  | 1.201269  | 1.965723  |
| 26 | 6  | 0 | 5.528887  | 2.424930  | -0.534189 |
| 27 | 1  | 0 | 3.408221  | 2.046855  | -0.445718 |
| 28 | 6  | 0 | 6.824274  | 1.680872  | 1.353115  |
| 29 | 1  | 0 | 5.706686  | 0.725204  | 2.943679  |
| 30 | 6  | 0 | 6.770125  | 2.298103  | 0.102319  |
| 31 | 1  | 0 | 5.477696  | 2.899211  | -1.514395 |
| 32 | 1  | 0 | 7.786415  | 1.574870  | 1.854242  |
| 33 | 6  | 0 | 8.010320  | 2.833190  | -0.545709 |
| 34 | 1  | 0 | 8.916166  | 2.406108  | -0.099672 |
| 35 | 1  | 0 | 8.026265  | 2.619012  | -1.621774 |
| 36 | 1  | 0 | 8.073247  | 3.924822  | -0.435267 |
| 37 | 35 | 0 | -2.635371 | -2.970431 | -2.483129 |
| 38 | 35 | 0 | 0.738656  | -3.815591 | -3.779025 |
| 39 | 35 | 0 | 2.959929  | -1.180695 | -2.340191 |
| 40 | 35 | 0 | 0.909776  | 4.308777  | -0.027844 |
| 41 | 35 | 0 | -2.086006 | 5.264505  | -2.025791 |
| 42 | 35 | 0 | -3.984514 | 2.113242  | -2.403718 |
| 43 | 35 | 0 | -4.884068 | -1.077722 | 0.948201  |
| 44 | 35 | 0 | -3.700123 | -1.355267 | 4.457281  |
| 45 | 35 | 0 | -0.072435 | -0.528910 | 4.269693  |
| 46 | 6  | 0 | 4.037805  | -3.554045 | 0.723694  |
| 47 | 6  | 0 | 3.049820  | -4.152183 | -0.083617 |
| 48 | 6  | 0 | 1.702441  | -3.820254 | 0.144908  |
| 49 | 6  | 0 | 1.348047  | -2.901440 | 1.109375  |
| 50 | 6  | 0 | 2.350588  | -2.227835 | 1.863333  |
| 51 | 6  | 0 | 3.704981  | -2.640581 | 1.695809  |
| 52 | 1  | 0 | 5.079718  | -3.840119 | 0.576771  |
| 53 | 1  | 0 | 0.930669  | -4.321101 | -0.442292 |
| 54 | 1  | 0 | 0.300294  | -2.656017 | 1.281840  |
| 55 | 1  | 0 | 2.071373  | -1.762996 | 2.806169  |
| 56 | 1  | 0 | 4.467530  | -2.188198 | 2.328905  |
| 57 | 6  | 0 | 3.427784  | -5.106604 | -1.169268 |
| 58 | 1  | 0 | 4.358875  | -5.638312 | -0.936298 |
| 59 | 1  | 0 | 2.639625  | -5.848224 | -1.351081 |
| 60 | 1  | 0 | 3.585940  | -4.570387 | -2.117971 |

-----

Zero-point correction= 0.369046 (Hartree/Particle)  
Thermal correction to Energy= 0.415893  
Thermal correction to Enthalpy= 0.416837  
Thermal correction to Gibbs Free Energy= 0.278128  
Sum of electronic and zero-point Energies= -2155.747077  
Sum of electronic and thermal Energies= -2155.700229  
Sum of electronic and thermal Enthalpies= -2155.699285  
Sum of electronic and thermal Free Energies= -2155.837994

### <sup>3</sup>INT9

-----

| Center<br>Number | Atomic<br>Number | Atomic<br>Type | Coordinates (Angstroms) |           |           |
|------------------|------------------|----------------|-------------------------|-----------|-----------|
|                  |                  |                | X                       | Y         | Z         |
| 1                | 5                | 0              | -1.972628               | -0.200426 | -0.809920 |
| 2                | 1                | 0              | -2.971134               | -0.504227 | -1.378573 |
| 3                | 7                | 0              | -0.762468               | -0.928939 | -1.455419 |

|    |    |   |           |           |           |
|----|----|---|-----------|-----------|-----------|
| 4  | 6  | 0 | -0.735017 | -2.058171 | -2.190405 |
| 5  | 6  | 0 | 0.564696  | -2.301102 | -2.595678 |
| 6  | 6  | 0 | 1.289731  | -1.249340 | -2.027417 |
| 7  | 7  | 0 | -2.061230 | -0.579626 | 0.691059  |
| 8  | 6  | 0 | -3.059795 | -1.108652 | 1.425024  |
| 9  | 6  | 0 | -1.368809 | -0.639870 | 2.730957  |
| 10 | 6  | 0 | -2.661133 | -1.174638 | 2.747886  |
| 11 | 7  | 0 | -1.749391 | 1.334038  | -0.901055 |
| 12 | 6  | 0 | -2.530467 | 2.291247  | -1.442568 |
| 13 | 6  | 0 | -1.929763 | 3.523602  | -1.264610 |
| 14 | 6  | 0 | -0.750512 | 3.224299  | -0.575994 |
| 15 | 7  | 0 | -0.650349 | 1.922724  | -0.351206 |
| 16 | 7  | 0 | -1.011644 | -0.287695 | 1.505176  |
| 17 | 7  | 0 | 0.502023  | -0.436952 | -1.342733 |
| 18 | 29 | 0 | 0.693397  | 0.672043  | 0.547704  |
| 19 | 7  | 0 | 2.281593  | -0.285033 | 1.171756  |
| 20 | 16 | 0 | 2.862422  | 0.931225  | 2.101363  |
| 21 | 8  | 0 | 1.832827  | 1.986558  | 1.819471  |
| 22 | 8  | 0 | 3.166058  | 0.588127  | 3.485845  |
| 23 | 6  | 0 | 4.357214  | 1.473283  | 1.326285  |
| 24 | 6  | 0 | 4.300591  | 1.979903  | 0.027465  |
| 25 | 6  | 0 | 5.560549  | 1.380937  | 2.014354  |
| 26 | 6  | 0 | 5.472746  | 2.396709  | -0.579790 |
| 27 | 1  | 0 | 3.345791  | 2.051555  | -0.492926 |
| 28 | 6  | 0 | 6.726601  | 1.807393  | 1.388771  |
| 29 | 1  | 0 | 5.570239  | 0.995550  | 3.032132  |
| 30 | 6  | 0 | 6.701044  | 2.315878  | 0.089731  |
| 31 | 1  | 0 | 5.442237  | 2.799185  | -1.592597 |
| 32 | 1  | 0 | 7.675968  | 1.750054  | 1.920874  |
| 33 | 6  | 0 | 7.958071  | 2.766074  | -0.589681 |
| 34 | 1  | 0 | 8.806560  | 2.791370  | 0.103604  |
| 35 | 1  | 0 | 8.224323  | 2.093853  | -1.417014 |
| 36 | 1  | 0 | 7.841629  | 3.769332  | -1.020030 |
| 37 | 35 | 0 | -2.276748 | -3.125724 | -2.518801 |
| 38 | 35 | 0 | 1.212546  | -3.746328 | -3.647949 |
| 39 | 35 | 0 | 3.159845  | -0.927201 | -2.189355 |
| 40 | 35 | 0 | 0.598497  | 4.443845  | -0.025442 |
| 41 | 35 | 0 | -2.561948 | 5.228196  | -1.817693 |
| 42 | 35 | 0 | -4.203148 | 1.940585  | -2.280191 |
| 43 | 35 | 0 | -4.739382 | -1.631453 | 0.698299  |
| 44 | 35 | 0 | -3.644007 | -1.833710 | 4.234524  |
| 45 | 35 | 0 | -0.194697 | -0.394264 | 4.207103  |
| 46 | 6  | 0 | 4.157835  | -3.166486 | 0.859361  |
| 47 | 6  | 0 | 3.224059  | -3.912488 | 0.086514  |
| 48 | 6  | 0 | 1.851674  | -3.597330 | 0.229434  |
| 49 | 6  | 0 | 1.418020  | -2.563035 | 1.006547  |
| 50 | 6  | 0 | 2.358069  | -1.666251 | 1.746560  |
| 51 | 6  | 0 | 3.779582  | -2.142321 | 1.666688  |
| 52 | 1  | 0 | 5.211073  | -3.449945 | 0.811817  |
| 53 | 1  | 0 | 1.118442  | -4.206150 | -0.305528 |
| 54 | 1  | 0 | 0.351945  | -2.353476 | 1.097749  |
| 55 | 1  | 0 | 2.046414  | -1.610939 | 2.808767  |
| 56 | 1  | 0 | 4.510662  | -1.608280 | 2.273883  |
| 57 | 6  | 0 | 3.686707  | -4.967300 | -0.862482 |
| 58 | 1  | 0 | 4.591661  | -5.472686 | -0.499506 |
| 59 | 1  | 0 | 2.913427  | -5.726953 | -1.036231 |
| 60 | 1  | 0 | 3.932111  | -4.534184 | -1.846628 |

-----

Zero-point correction= 0.371305 (Hartree/Particle)  
Thermal correction to Energy= 0.417660  
Thermal correction to Enthalpy= 0.418604  
Thermal correction to Gibbs Free Energy= 0.281524  
Sum of electronic and zero-point Energies= -2155.766641  
Sum of electronic and thermal Energies= -2155.720286  
Sum of electronic and thermal Enthalpies= -2155.719341  
Sum of electronic and thermal Free Energies= -2155.856421

!INT11

| Center<br>Number | Atomic<br>Number | Atomic<br>Type | Coordinates (Angstroms) |           |           |
|------------------|------------------|----------------|-------------------------|-----------|-----------|
|                  |                  |                | X                       | Y         | Z         |
| 1                | 5                | 0              | -1.579222               | -1.068396 | 0.052431  |
| 2                | 1                | 0              | -2.523887               | -1.769908 | 0.228212  |
| 3                | 7                | 0              | -0.566709               | -1.280290 | 1.214969  |
| 4                | 6                | 0              | -0.559433               | -2.211105 | 2.193682  |
| 5                | 6                | 0              | 0.690615                | -2.234485 | 2.780720  |
| 6                | 6                | 0              | 1.404376                | -1.267177 | 2.064072  |
| 7                | 7                | 0              | -2.049393               | 0.413600  | -0.023137 |
| 8                | 6                | 0              | -3.161503               | 0.992904  | 0.471220  |
| 9                | 6                | 0              | -2.111640               | 2.410133  | -0.814654 |
| 10               | 6                | 0              | -3.254040               | 2.283874  | -0.016724 |
| 11               | 7                | 0              | -0.879625               | -1.438665 | -1.280583 |
| 12               | 6                | 0              | -1.258398               | -2.348382 | -2.206465 |
| 13               | 6                | 0              | -0.390431               | -2.292965 | -3.277048 |
| 14               | 6                | 0              | 0.512967                | -1.289525 | -2.908465 |
| 15               | 7                | 0              | 0.235716                | -0.781537 | -1.722069 |
| 16               | 7                | 0              | -1.387564               | 1.306641  | -0.806490 |
| 17               | 7                | 0              | 0.656296                | -0.688151 | 1.142365  |
| 18               | 29               | 0              | 0.735738                | 0.906427  | -0.346024 |
| 19               | 7                | 0              | 1.617471                | 2.673755  | 0.331976  |
| 20               | 16               | 0              | 2.790570                | 3.164068  | -0.868487 |
| 21               | 8                | 0              | 2.134550                | 2.918135  | -2.140151 |
| 22               | 8                | 0              | 3.304669                | 4.482376  | -0.516964 |
| 23               | 6                | 0              | 4.050424                | 1.958989  | -0.580856 |
| 24               | 6                | 0              | 3.901169                | 0.689991  | -1.134354 |
| 25               | 6                | 0              | 5.153460                | 2.285128  | 0.201853  |
| 26               | 6                | 0              | 4.867916                | -0.270203 | -0.884101 |
| 27               | 1                | 0              | 3.046876                | 0.464164  | -1.769549 |
| 28               | 6                | 0              | 6.107105                | 1.304551  | 0.449418  |
| 29               | 1                | 0              | 5.270379                | 3.295461  | 0.589029  |
| 30               | 6                | 0              | 5.973311                | 0.016587  | -0.076583 |
| 31               | 1                | 0              | 4.754469                | -1.266805 | -1.312125 |
| 32               | 1                | 0              | 6.977433                | 1.543344  | 1.060362  |
| 33               | 6                | 0              | 6.968782                | -1.055967 | 0.240513  |
| 34               | 1                | 0              | 7.888568                | -0.646134 | 0.673333  |
| 35               | 1                | 0              | 6.547164                | -1.767961 | 0.965090  |
| 36               | 1                | 0              | 7.237811                | -1.633077 | -0.653025 |
| 37               | 35               | 0              | -2.073092               | -3.268408 | 2.665317  |
| 38               | 35               | 0              | 1.287148                | -3.296581 | 4.241552  |
| 39               | 35               | 0              | 3.248458                | -0.818945 | 2.297632  |
| 40               | 35               | 0              | 1.973909                | -0.657302 | -3.964452 |
| 41               | 35               | 0              | -0.411787               | -3.335306 | -4.868356 |
| 42               | 35               | 0              | -2.747027               | -3.523434 | -2.010859 |
| 43               | 35               | 0              | -4.316644               | 0.124934  | 1.713701  |
| 44               | 35               | 0              | -4.570686               | 3.597099  | 0.387669  |
| 45               | 35               | 0              | -1.554220               | 3.915390  | -1.849459 |
| 46               | 6                | 0              | 1.583283                | 2.199120  | 2.826220  |
| 47               | 6                | 0              | 0.280372                | 1.962896  | 3.090944  |
| 48               | 6                | 0              | -0.743939               | 2.720526  | 2.388138  |
| 49               | 6                | 0              | -0.449161               | 3.642918  | 1.454105  |
| 50               | 6                | 0              | 0.929762                | 3.829022  | 0.995007  |
| 51               | 6                | 0              | 1.993332                | 3.073540  | 1.727073  |
| 52               | 1                | 0              | 2.361134                | 1.759363  | 3.447375  |
| 53               | 1                | 0              | -1.779044               | 2.596221  | 2.715265  |
| 54               | 1                | 0              | -1.214291               | 4.313763  | 1.067824  |
| 55               | 1                | 0              | 1.200911                | 4.792319  | 0.562317  |
| 56               | 1                | 0              | 2.976288                | 3.542694  | 1.789004  |
| 57               | 6                | 0              | -0.169175               | 1.013343  | 4.154292  |
| 58               | 1                | 0              | 0.675566                | 0.537326  | 4.668037  |
| 59               | 1                | 0              | -0.791890               | 1.518867  | 4.905682  |
| 60               | 1                | 0              | -0.791004               | 0.216345  | 3.715095  |

Zero-point correction= 0.373593 (Hartree/Particle)  
 Thermal correction to Energy= 0.419616  
 Thermal correction to Enthalpy= 0.420560  
 Thermal correction to Gibbs Free Energy= 0.285976

Sum of electronic and zero-point Energies= -2155.806608  
 Sum of electronic and thermal Energies= -2155.760586  
 Sum of electronic and thermal Enthalpies= -2155.759641  
 Sum of electronic and thermal Free Energies= -2155.894225

κ<sup>2</sup>N<sub>2</sub>O-<sup>1</sup>INT1-a (B3LYP)

| Center Number | Atomic Number | Atomic Type | Coordinates (Angstroms) |           |           |
|---------------|---------------|-------------|-------------------------|-----------|-----------|
|               |               |             | X                       | Y         | Z         |
| 1             | 5             | 0           | -2.317458               | -0.066517 | 0.012398  |
| 2             | 1             | 0           | -3.516110               | -0.127193 | -0.014724 |
| 3             | 7             | 0           | -1.712562               | -1.230195 | -0.830566 |
| 4             | 6             | 0           | -2.312589               | -2.313006 | -1.367514 |
| 5             | 6             | 0           | -1.338797               | -3.143658 | -1.910235 |
| 6             | 6             | 0           | -0.127886               | -2.487445 | -1.654469 |
| 7             | 7             | 0           | -1.789136               | -0.161006 | 1.452061  |
| 8             | 6             | 0           | -2.468907               | -0.319459 | 2.614680  |
| 9             | 6             | 0           | -0.302289               | -0.229294 | 3.013351  |
| 10            | 6             | 0           | -1.550499               | -0.367636 | 3.650110  |
| 11            | 7             | 0           | -1.832696               | 1.266713  | -0.620566 |
| 12            | 6             | 0           | -2.523105               | 2.367138  | -0.985547 |
| 13            | 6             | 0           | -1.621651               | 3.342401  | -1.395596 |
| 14            | 6             | 0           | -0.362843               | 2.745271  | -1.243750 |
| 15            | 7             | 0           | -0.508291               | 1.499199  | -0.778908 |
| 16            | 7             | 0           | -0.450291               | -0.104394 | 1.694134  |
| 17            | 7             | 0           | -0.373724               | -1.341379 | -1.012219 |
| 18            | 29            | 0           | 0.803666                | 0.063068  | -0.301407 |
| 19            | 7             | 0           | 2.291036                | -1.142119 | -0.154347 |
| 20            | 16            | 0           | 3.345893                | 0.021065  | -0.065966 |
| 21            | 8             | 0           | 2.340803                | 1.210147  | -0.016281 |
| 22            | 8             | 0           | 4.403118                | -0.028288 | 0.937860  |
| 23            | 1             | 0           | -3.601734               | 2.379026  | -0.924119 |
| 24            | 1             | 0           | -1.844113               | 4.336947  | -1.752257 |
| 25            | 1             | 0           | 0.625163                | 3.139245  | -1.436709 |
| 26            | 1             | 0           | -3.386989               | -2.416608 | -1.319270 |
| 27            | 1             | 0           | -1.484874               | -4.085955 | -2.416696 |
| 28            | 1             | 0           | 0.890559                | -2.768970 | -1.878168 |
| 29            | 1             | 0           | -3.547836               | -0.385735 | 2.617026  |
| 30            | 1             | 0           | -1.751952               | -0.485128 | 4.704772  |
| 31            | 1             | 0           | 0.689594                | -0.216278 | 3.445842  |
| 32            | 1             | 0           | 4.004661                | 0.268738  | -1.237366 |

Zero-point correction= 0.225655 (Hartree/Particle)  
 Thermal correction to Energy= 0.243984  
 Thermal correction to Enthalpy= 0.244928  
 Thermal correction to Gibbs Free Energy= 0.178001  
 Sum of electronic and zero-point Energies= -1502.173166  
 Sum of electronic and thermal Energies= -1502.154837  
 Sum of electronic and thermal Enthalpies= -1502.153893  
 Sum of electronic and thermal Free Energies= -1502.220821

κ<sup>2</sup>N<sub>2</sub>O-<sup>3</sup>INT1-a (B3LYP)

| Center Number | Atomic Number | Atomic Type | Coordinates (Angstroms) |           |           |
|---------------|---------------|-------------|-------------------------|-----------|-----------|
|               |               |             | X                       | Y         | Z         |
| 1             | 5             | 0           | -2.190573               | -0.041562 | 0.607164  |
| 2             | 1             | 0           | -3.313313               | -0.067237 | 1.031565  |
| 3             | 7             | 0           | -2.041615               | -1.049335 | -0.563689 |
| 4             | 6             | 0           | -2.917924               | -1.965405 | -1.032764 |
| 5             | 6             | 0           | -2.307412               | -2.679497 | -2.054697 |
| 6             | 6             | 0           | -1.021082               | -2.125770 | -2.150049 |
| 7             | 7             | 0           | -1.185493               | -0.390702 | 1.732978  |
| 8             | 6             | 0           | -1.422788               | -0.762459 | 3.012323  |
| 9             | 6             | 0           | 0.753538                | -0.730558 | 2.646334  |
| 10            | 6             | 0           | -0.206386               | -0.990852 | 3.638480  |

|    |    |   |           |           |           |
|----|----|---|-----------|-----------|-----------|
| 11 | 7  | 0 | -1.856229 | 1.377071  | 0.067348  |
| 12 | 6  | 0 | -2.587125 | 2.511149  | 0.067915  |
| 13 | 6  | 0 | -1.826762 | 3.531067  | -0.491506 |
| 14 | 6  | 0 | -0.606215 | 2.923356  | -0.816091 |
| 15 | 7  | 0 | -0.639391 | 1.629514  | -0.476422 |
| 16 | 7  | 0 | 0.157240  | -0.370071 | 1.507186  |
| 17 | 7  | 0 | -0.874231 | -1.147217 | -1.253322 |
| 18 | 29 | 0 | 0.655985  | 0.103448  | -0.535215 |
| 19 | 7  | 0 | 2.180867  | -1.040470 | -1.054789 |
| 20 | 16 | 0 | 3.341489  | -0.032968 | -0.510113 |
| 21 | 8  | 0 | 2.673862  | 1.310654  | -0.605734 |
| 22 | 8  | 0 | 3.954069  | -0.446777 | 0.754951  |
| 23 | 1  | 0 | -3.591342 | 2.512277  | 0.466464  |
| 24 | 1  | 0 | -2.114071 | 4.561221  | -0.639767 |
| 25 | 1  | 0 | 0.283912  | 3.343036  | -1.263812 |
| 26 | 1  | 0 | -3.907383 | -2.043859 | -0.605494 |
| 27 | 1  | 0 | -2.730775 | -3.480180 | -2.642763 |
| 28 | 1  | 0 | -0.201294 | -2.382105 | -2.806851 |
| 29 | 1  | 0 | -2.435912 | -0.837105 | 3.381180  |
| 30 | 1  | 0 | -0.039523 | -1.298115 | 4.660242  |
| 31 | 1  | 0 | 1.833257  | -0.782918 | 2.691706  |
| 32 | 1  | 0 | 4.323361  | -0.028441 | -1.453678 |

-----

Zero-point correction= 0.224355 (Hartree/Particle)  
Thermal correction to Energy= 0.243434  
Thermal correction to Enthalpy= 0.244378  
Thermal correction to Gibbs Free Energy= 0.173786  
Sum of electronic and zero-point Energies= -1502.182632  
Sum of electronic and thermal Energies= -1502.163553  
Sum of electronic and thermal Enthalpies= -1502.162608  
Sum of electronic and thermal Free Energies= -1502.233201

$\kappa^2\text{N}_2\text{O}$ -**INT1-a** (M06)

-----

| Center<br>Number | Atomic<br>Number | Atomic<br>Type | Coordinates (Angstroms) |           |           |
|------------------|------------------|----------------|-------------------------|-----------|-----------|
|                  |                  |                | X                       | Y         | Z         |
| 1                | 5                | 0              | -2.301290               | -0.067957 | 0.064964  |
| 2                | 1                | 0              | -3.502705               | -0.133133 | 0.082109  |
| 3                | 7                | 0              | -1.720342               | -1.199824 | -0.833073 |
| 4                | 6                | 0              | -2.326182               | -2.280228 | -1.356050 |
| 5                | 6                | 0              | -1.368926               | -3.094813 | -1.938513 |
| 6                | 6                | 0              | -0.160185               | -2.431122 | -1.717487 |
| 7                | 7                | 0              | -1.712299               | -0.204179 | 1.473732  |
| 8                | 6                | 0              | -2.336293               | -0.416675 | 2.653322  |
| 9                | 6                | 0              | -0.163655               | -0.330066 | 2.954746  |
| 10               | 6                | 0              | -1.376403               | -0.503390 | 3.640839  |
| 11               | 7                | 0              | -1.839436               | 1.281312  | -0.544491 |
| 12               | 6                | 0              | -2.535761               | 2.395655  | -0.828998 |
| 13               | 6                | 0              | -1.650745               | 3.384020  | -1.226600 |
| 14               | 6                | 0              | -0.394300               | 2.777576  | -1.149863 |
| 15               | 7                | 0              | -0.527567               | 1.515892  | -0.741786 |
| 16               | 7                | 0              | -0.370602               | -0.149725 | 1.655651  |
| 17               | 7                | 0              | -0.394422               | -1.296803 | -1.060971 |
| 18               | 29               | 0              | 0.779673                | 0.081296  | -0.351302 |
| 19               | 7                | 0              | 2.235200                | -1.127192 | -0.234282 |
| 20               | 16               | 0              | 3.291757                | 0.028727  | -0.100927 |
| 21               | 8                | 0              | 2.298584                | 1.208131  | -0.027962 |
| 22               | 8                | 0              | 4.329228                | -0.052016 | 0.907001  |
| 23               | 1                | 0              | -3.614033               | 2.402913  | -0.722969 |
| 24               | 1                | 0              | -1.882049               | 4.396832  | -1.527379 |
| 25               | 1                | 0              | 0.590323                | 3.178853  | -1.361231 |
| 26               | 1                | 0              | -3.400537               | -2.390691 | -1.267830 |
| 27               | 1                | 0              | -1.523457               | -4.036268 | -2.447952 |
| 28               | 1                | 0              | 0.855980                | -2.701452 | -1.977957 |
| 29               | 1                | 0              | -3.417147               | -0.489560 | 2.696492  |
| 30               | 1                | 0              | -1.529343               | -0.667181 | 4.699385  |
| 31               | 1                | 0              | 0.850789                | -0.329701 | 3.339422  |



32 1 0 3.958500 0.300944 -1.258471

-----  
Zero-point correction= 0.225451 (Hartree/Particle)  
Thermal correction to Energy= 0.243749  
Thermal correction to Enthalpy= 0.244693  
Thermal correction to Gibbs Free Energy= 0.177577  
Sum of electronic and zero-point Energies= -1501.604803  
Sum of electronic and thermal Energies= -1501.586505  
Sum of electronic and thermal Enthalpies= -1501.585561  
Sum of electronic and thermal Free Energies= -1501.652677

$\kappa^2\text{N}_2\text{O}$ -INT1-a (M06)

-----

| Center<br>Number | Atomic<br>Number | Atomic<br>Type | Coordinates (Angstroms) |           |           |
|------------------|------------------|----------------|-------------------------|-----------|-----------|
|                  |                  |                | X                       | Y         | Z         |
| 1                | 5                | 0              | -2.151192               | -0.023707 | 0.665603  |
| 2                | 1                | 0              | -3.253802               | -0.044763 | 1.147542  |
| 3                | 7                | 0              | -2.053590               | -1.045615 | -0.494565 |
| 4                | 6                | 0              | -2.934196               | -1.984516 | -0.893363 |
| 5                | 6                | 0              | -2.363957               | -2.719440 | -1.916837 |
| 6                | 6                | 0              | -1.094838               | -2.152956 | -2.083867 |
| 7                | 7                | 0              | -1.087574               | -0.356208 | 1.740787  |
| 8                | 6                | 0              | -1.256443               | -0.736200 | 3.023142  |
| 9                | 6                | 0              | 0.889936                | -0.693844 | 2.549734  |
| 10               | 6                | 0              | -0.014009               | -0.962673 | 3.584988  |
| 11               | 7                | 0              | -1.837898               | 1.385046  | 0.095588  |
| 12               | 6                | 0              | -2.552657               | 2.523547  | 0.130880  |
| 13               | 6                | 0              | -1.807440               | 3.534668  | -0.452251 |
| 14               | 6                | 0              | -0.611561               | 2.914586  | -0.825263 |
| 15               | 7                | 0              | -0.647278               | 1.624898  | -0.492510 |
| 16               | 7                | 0              | 0.236152                | -0.328635 | 1.450084  |
| 17               | 7                | 0              | -0.922371               | -1.148964 | -1.229425 |
| 18               | 29               | 0              | 0.617433                | 0.102888  | -0.576122 |
| 19               | 7                | 0              | 2.094287                | -1.071705 | -1.044024 |
| 20               | 16               | 0              | 3.271017                | -0.057423 | -0.550409 |
| 21               | 8                | 0              | 2.667600                | 1.287454  | -0.743659 |
| 22               | 8                | 0              | 3.825023                | -0.419100 | 0.745637  |
| 23               | 1                | 0              | -3.542297               | 2.529736  | 0.572024  |
| 24               | 1                | 0              | -2.088494               | 4.570454  | -0.585633 |
| 25               | 1                | 0              | 0.269086                | 3.325368  | -1.306295 |
| 26               | 1                | 0              | -3.903591               | -2.060366 | -0.414478 |
| 27               | 1                | 0              | -2.803682               | -3.543974 | -2.461718 |
| 28               | 1                | 0              | -0.297577               | -2.418939 | -2.769016 |
| 29               | 1                | 0              | -2.253925               | -0.817488 | 3.439638  |
| 30               | 1                | 0              | 0.206753                | -1.274091 | 4.597137  |
| 31               | 1                | 0              | 1.973897                | -0.742028 | 2.535694  |
| 32               | 1                | 0              | 4.265676                | -0.167925 | -1.469191 |

-----

Zero-point correction= 0.224226 (Hartree/Particle)  
Thermal correction to Energy= 0.243116  
Thermal correction to Enthalpy= 0.244060  
Thermal correction to Gibbs Free Energy= 0.174771  
Sum of electronic and zero-point Energies= -1501.613098  
Sum of electronic and thermal Energies= -1501.594208  
Sum of electronic and thermal Enthalpies= -1501.593264  
Sum of electronic and thermal Free Energies= -1501.662553
